# Supplementary material for: Updating the Genome of the Elite Rice Variety Kongyu131 to Expand Its Ecological Adaptation Region
Source: Front Plant Sci. 2019 Mar 13;10:288. doi: 10.3389/fpls.2019.00288 (PMC6424915; doi:10.3389/fpls.2019.00288)
Supplement: Supplementary file 7 [file Data_Sheet_1.xlsx]

## Sheet: SupplementaryData
chromosome	SNP-poition	SNP	start	end	sequence(201base)
chr01	34239	A	34139	34339	TAGTGTTATAACGCATAATACTTATAATTTTTATTAGTCTAAAGTTAGTGAATTTGATTTTCTTTGAAACAAGGACATCGAATCATTTGGGACAGAAGTAATAGTATATtactccatccgtcccctgatataagaggttttaatattttacttgtactgtttgactattcgtcttattccaaaaaaatagaattattattt
chr01	1049995	T	1049895	1050095	TTTTTGTTTATTGGCTTCTTTCTTTATTGTGGTTGTATAAGCTGCTGGAGTAGTATCTTCTGATTTACTGAAACCTCATTCAGAATTTTGTACCTTAGCATATTAAAGTTAATCATGGCAAACCTATGTTTCACATTGTTTTGCTTATCTCTTTCTGCAAATCGCTAAGACAGAATATTAGTGTTTTAATAGTTTTGTGAT
chr01	1550452	G	1550352	1550552	tttttGAGGGGGCATGCATGCAACTGCCCCTAATCAAGACTGAAAAGTACTACTACTTGTAGGAAGAAGAGGGGTACATTTTAATTTGGTGGGTTAATTAGCTTCTTGGGGGAGAAGAGAAGGAAGAGGAGAGGAGAAAGCCAAGTGCGTTGTTACACACCAAAAGGTCAGGGCAATCTGTCAAAGCTTCCATCTTTTTCT
chr01	1696343	T	1696243	1696443	GGGTGGAGAAACATCAAGCCATGAGCTCTTGCCAGCAATCCCAATGGTGATGGCGACTGTGGTAAGGTCCTCTCGGTCATCCTGGTATGCCTTCCAATTGTTACATACTCCTCTCTTCTTCGAAACTATAGTTAGATCCAATTTGTTCGGTCGTTGGCGCAATTGTGGAACACGTGGCAAAGCGACGAAGCTACACAACAA
chr01	3077614	C	3077514	3077714	GTACATTAGTATCTTCCTCTTCTTCTCGTGCTGTAGACCTGCAGTAATGTTACTGTCGTCTTCTTTCTGAAGTTTAAAGTTGAGTTTCTGAATTAAGTAACTGCAGTAATTGGTTATCATAGTCGTCCGGAAATCACTCTTAACTCGTTAATGGTCTCTCTTGAGTCTCCCCATCGACCAAGGTGACCGACTAATGGAGAT
chr01	4001908	A	4001808	4002008	TCCGTGTGGATCATGCATGCATTGTCTGGCCCATCTGGTTTGTTAACTTGTTGAGAGCATGCTTGCTTGCACAACAGTACAAAGCCAGATGTGTCCTACAAAGTTGCAGACTTGTAGCTGCACTAGCTTACACATCCATGGCCTATTCCACTGTAGGAATATAAATATACATACACACACACATCTATACAAATACATGTC
chr01	5006541	A	5006441	5006641	GAAAAAAAATTCTTGAGCATTATATTAATTAGCAAAATTATTGTTTTCTTAAGTAAGCTAAATTTTGTGCATGCGTGTGGCCCTTGAAAATGTAAAGGTAATCTTAATCGTCCTTGAAGATCTTGTTTATTTAAAGACAAAAAAAACTCTTTTTTTGCAGTGTTTTTGGTGGGCTCTGAAGGGAGAAATGTGGATTAGTCT
chr01	6227063	A	6226963	6227163	CACTAACGACGTAGAGAAGGTGTTAATTACACCTAATTACAGAGGCAATCAATTCTTTCTTTCATCAAGGAAAGGAAAAGGCAGAGTACGAGTACTTGCTACTGTTACTCCCAGTTGTGATAAGGGCCTTTAGCTGAAGTAGCTTTTCTTAAGGATGCGTCATGTCAAATCGATTTGATTAGTCGATTTTGTTTGATTTGA
chr01	7003943	A	7003843	7004043	TGACCCCGGTTCCTTCGGATCTGAGCGCAGCATTCATGGCGATCGATCGATCCATGCACACCGGTGTGGATGGAATGTGTATCAGAGGAGGAGACCACGCATGTCTGCACATCGTTTTGTGTGCTTCGTCGTACTGTACCACTACTGTTCATTCCTACTGTACTCTCTCCTCCTCCTACTCGTATACAAAGCCTCAACtat
chr01	8108581	A	8108481	8108681	CATTTAAAATTTTTGGTGGGGAATTTCTTCAAACTATATTTATCACTTTTTTCTTCAAAGTTAAAAAATGCGTTGGTATCTTCAACCTTTCCACCAATAGAAAAATGACATGTGAAGGCAAGTAACCGGCCATATGCCAGAACTGTCAGCTCCAGCAACTCTCTACTGGTCAACCTGAGATGTGTATTGGTTCATTTTTTT
chr01	8434761	g	8434661	8434861	caattacacagtttacgtgtaaattgcgagacgaatcttttaagcttaattgtgccatgatttgataatgtgatgctacagtaaaatatttgttaataacggattaattaggctttctggtggaatatataatttattttgctagtagaatacgtttaatacttcgtatatttaatgtgacaacaaaacctaaaaaatttt
chr01	9140961	C	9140861	9141061	AAGGTGTGGTGTCTAATATTAATTTTTTAACTAGAATATACGTACTAGACAAGTTGTTGCATCTAAATAATCATTTTTTAAGTTGTTGTACTAGATCGTACGTACCTACCAAATTTATATACCATGGATGCAATTTAGTATATTTGTATGTTACCTTTACGGCTTTACTGTAGGCGTCATTCCTAGAACACATGGGATATA
chr01	9259055	A	9258955	9259155	CTGGAAATTTGAGGAGTGCTCAGTAGCTGGTGCTTATTGATGGACTGTATCTGTGGGAAGACATGGATTGAACTGTTAGGGGTGTGCGGTCACGCAGTGCATCTCTGGGCAAATAGAACAGAAGCAAAATGTGTACATCAACTTAGGATTCAGTTAGTCTGGGAAATATCTGTACACAACCCGAAAAGAAGAAAAAGAACC
chr01	11006007	A	11005907	11006107	TTTACTAAACGAATTAAGATCATCTACAATATTACACAACTGTTCACTAACATGTGGACTCGAGGATTGTGAAGCCCATCACGTCTCAGCGAGTAATACTACACATACATAACTACAGAGGACCTGCATCCTTACTAAACTCGGAATCAACAGCCCTAGTCAAGAGCCTGAGGTGATGATAACGGGCGGGTAGGTGGAGgg
chr01	14130185	G	14130085	14130285	GATTATCATATAATGAAAAACAAATTTTCTAAAATTGATCATCATATAACTGCATGGACACGGATTTTATCGGAGTGCAATTAATATAGCACTGAAAAATGTATGCATGCTAAGGACCTAATTGTGCATTGTATTTTTAATCGATGCATGCATTGTGAGAGAATGTATGCATATTGTGCATAGATGTGGTTTAATTTATTT
chr01	19555763	C	19555663	19555863	ACGTCTTAAAATTGTGTCGACTGCTGCCATGGGCCTCATGAGAAGTGCACACCGCTTGACAAACCGTTAATCCCCTTCAGTTACCTCCACGGGAATGGCACCAGATTGAGGTTGATTGCTGAGCCGAAGATATTGGTGTAAGCATCACCGGACTCAACAAAGAATCCCCACGAGGTTTGTCATTGAATCTGAGGAACTTTA
chr01	21502243	G	21502143	21502343	ACGTAAAGCCAAGCACTTGAAAGATCATTGGGGAAAGATAAACAGGAAGGTTGTGCACTTCAATGGAATTTATTGCATACTGAAGGAGGTGTTTGTGTTTGTGAATGGCCAAAATAAGATCATCGATCAAATATTACTACACAAGATCGAACAGTGGTAGTTACTATACACAGGTTAGTAGATGCACCACGAACATTCAGT
chr01	22585822	T	22585722	22585922	TCCATTATCTTATAAATGCGAGCAAACATATTGTATATAAATATTAACAACACAATATACACTAAGTAGTGATACTATCATGCCTTTCATAAATCAACAATGGAGACAGAGAAACATTGGgctctgttgggcgctgagggttgggaactctttccccggcatacaaaatggaacaatgtattagggcatgattaattaaat
chr01	23692151	G	23692051	23692251	TAATTATATTTTCCTAGGTTTAAGAAGTTATTAAGAACATAAGACTCAGCATGGTGCAGAGTTAGAAAATGGTTAATTTTCGGTATGTTACAACAGTGCCGGTCCCCtgcaacaaatcaaccacatattttggaaactctctattaagtaaatttggtttatttttgttccacaaaaaatgtttcacctagtgcactcaca
chr01	24300485	t	24300385	24300585	TATGGCTTATACTTTTGAAGGTTTTGTTATCACTTGTAAACTAGTAAATCTTTACTAGCGAGTTCTTTCTGTTGAgttcgctacttacctttctcgtttttcgtgcacacgctttcaaacagctaaactgtttatatttttcaaaaattttgctatacgaaagtatctttaaaaaactatattaatcctttttttaaaaaa
chr01	25248215	T	25248115	25248315	AGGGAGTGACATGAGGAGTCGAAGTGGAGAGAACAGGGGTGCCCGAACCGAGGTGGAGAAGGGGGTGGCGGCGTAGCGGACTCCACGACTTACTTCCTGCTCTAGCTACTGCTTCAAGTAGtgtcttcgcacgcaacataagtcttttctgcacattttatcctcactcgtgtgcactggaaagaatttcccggtcggtca
chr01	27048866	C	27048766	27048966	AGGCCACTTGACTGTGCATGAAAAAGATCTAAAGTTTGGACAATTTTCATAATAATACGTAGAGCTTTTGGTTTAATTCAGAGAAAGGTTTCCATAACTACAATGATTAAAAATAATTCGTGCACTTAATATAATACATATGTTCCACAGGGCGGGCATGCGGGAGCGCCAGTCCCACGCTCCCAACGGCGGGAGCGTATC
chr01	27834407	G	27834307	27834507	CTAGTGAACTTGCCGCGCCTAGCCATGCTAGAACAATCACCAACAGTATGCCACCAAGGTAGGGGGTGGAGTTAGCTAAAGAGCCAAATGTAAGGATCATGAACTGTTGAATAAGAGCTCCACCAGACTTCCCCAATGGGTTGCAGACAACATCAATGGCTGCCTTTCCCTTCACCTGCAAACAGAGGAAGCAGAGTTGGC
chr01	29380043	A	29379943	29380143	aaaatagtttctagtccaagtttttagttgaaccaggactattgtagattttggccaacctataaaagatagtttctctagtagttgtGATCACATGCATATAAGGGTTGCAGTTGTTCGTAAGATACACGGTGTTACTTCGCAAAGAAAAGCAAATGCTCATGTATTGATGTACGTAAGCAACATGTTCACAAAAATGAT
chr01	29395642	a	29395542	29395742	tatgtatatatatagttttacacatttcacaaaagtttttgaataagacgaatggtcagacatgtttaaaaaagtcaacggtgtcaaatatttagggaagaagggagtaCTAAGTGATTCATTTGGTTGGTTGAATGCCACCGGGGTCATCTGACCCGGTGATATTATTGTGGCTCTGTCCATAGGTCTTTCTAGACGGAC
chr01	31432232	A	31432132	31432332	TAGGAGTAACTTTTATTCAGATGCAGGTGAGGTACTCAGCTGCTTTTGTGTAGAACTCTGTGATGCCACGACTGCTCGATAGTTAAGTTCCATGAAAGCAACATTTTGTTAGCTAGCTTCACGCCTCTGGTCCAAGCGAAAATTACAGCGTAGCTGACGCCTGGCTGACCAGCTGGGGTCGAACAGTCCTTCTTTTGGGTA
chr01	32232706	G	32232606	32232806	GCTGAAATGCAGGGAAAAAAGGGTAAGATTTACAAGATCAAAAACACATGTAGGATGATGTAACTTGACCCGTCGAGCATTCATGCATGCAAGCAAACAAGAAATAATTGTGTAGTAAGAACATCTCCAATAGCCTCTTCATCCCACTCTCCAAGCCAAATTTTAACCATTCTAGCAAAAAAAAAAAAGTACTCCAACAGC
chr01	33392792	G	33392692	33392892	TAGCACTCTCCTAGATTAAAGTTAAAATGTAGTAGTCCTGAAGTTTGTCATGTTGAAACCAATCTTATATTTTCGCATGGCCCTTGTTGTAGGTCAAGACGAAACTAGATGAACACCAAGCACCAAAGGTGAATAAACCTTAAGGATTCACATACTAATAACTGTTGATGGATAGTTCCCATCACTAATTTATGGCTCTGA
chr01	35386156	C	35386056	35386256	TTCTGGGTTGATTTCTTTGCTGTTGCTGCGCTGCTTTACTTCCGGTGTCGGAGTAGGTGTTCGAGATGATCTTTGTGTGACCGATTCGGAAGGGAGGCAGCCGTTTTATAGTTTCGAGGTAACCCGGGTCGGTCGCGGCTCCCATCACCTAAAGTTACGCCGATGTGGAGGTCCAGTCCAACGTGGACGCCGAGGTGGACG
chr01	37002753	G	37002653	37002853	GTAAATTTGATATCTCTTGATACCTAGGTACTGTGAGGTATCATGAGTGACCAATTTTTACACTAAATTTTTAGTACCTCATGGTACCTCCTCAAGTACCGTAGAATTACTCTCAGAAGGACTCATTTTGATCGGTTGCAAACACGTAGTCTCGCAGTTAAAAAAAAAACCACGTAGTCTCGTGAAATAAGCCTAGAATTG
chr01	37003345	G	37003245	37003445	TTAACGAACATAGCGAAGCTTGAGTATCAGAACAAGGCATTTTATACGCATGGGGATCACATGATGATATTAAACTACTTGACCGACACAGCGTTCATCCGTGAAATTATCGCCCAAAACGCAATGCCTCGTCCAGCCAGTAGTACATCGGCTCTGGGTTTCTTCATTATAGTTCAGTTGGATCGTCGGTTTCATCTAGAC
chr01	39659825	T	39659725	39659925	CATCATGTATACATATTTCTAGCAAATGAATAGAATGTGCAGTCACATGTTTATAATTTGCAGAAGCAGTGAGATCAATGCTAACCTTTTGTCAGCAGCATATATCTTTAGTAATTCATCCATATCTTTCGATATAAGATTCTGAACACCTTCTGAATGAAGAACTACTTCTTTTAAATGCTTTATGCTCTCTTTTGAAAG
chr01	42565067	G	42564967	42565167	ATTAATTTCTAGCATGCATCCTCTAATATAATTAAGATATATATCCGCAGCATTTGCTTATGCTTATTAGGTGCAGAATTTTCTTAAAATGATAAAAATGGTTTACATCTATGTCCTCTGCCGACATGCATATAACCAATAAGTTTTAGAGTTAAAAATAAAATGAAATATCGAGTTAACATAAATCATATAGTTTTTAAC
chr01	43545937	T	43545837	43546037	GGGAGGTAGAGGAGAGGGTGTGGGTTCTAGATACTAAGATACAGGGTGATGCACTGGTGCAAGTTTTGTTGGTGTCTAGGTCACCGATATCATGGAATAGTTTGACACATATACAATCGTGAGGTGTGAAAAACAGTGATCATCAAGAGAGGTTGGATGGGGATAGGGATCACTGGAGAGTGTAGACGAATGCAGGTTCAT
chr01	43575337	G	43575237	43575437	TAAACTATAATATAACATGTAACCCACCGTACAATTTCTTTAAATTTGTCTAAACTATAATAGGCAATGTTACATAGCCTAAAGTGAAACGATGTTGATAGCATGTAACCCACCGTACAATTTCTTTAAATTAAAAAAATATCTAGGGTATTTCCAACTGAGGAGGGAGGCAGTGAATTGAAGTGGGGCAGGAATTAAAAG
chr01	44653044	T	44652944	44653144	GGCACATGATGGGAAGCAAGTGAGAGTTGCATAGGATTTGGGCAGACTTGGCAGGTTGGCTTCCGTCCCATAATATAGCAATCTAGGATGGGATGGAATCTATTATAGGACAATGTATCTAGACATGACTCGTAATATAGCAACCTAGGATGGGATGAGATCCATCCTAGGACTAGATATATTATGGGACGGAGGGAGTAG
chr01	44806431	A	44806331	44806531	AGAAAAATTGAGAACCAATCCTCTCTTCATGTTGACAAGCGCAACAAATTAAAGTTATTTCATCTCGTAATTTATGTGCACAAGTGTAGCCAGAGGCATGATGAACGTATATTTATCCTCCTCCACAAGTCCATCGATCTGCTGCTACCTAGTTGCAGAATTAATTAGCTACAGTACGTCTACATAGTGGAGTACTATGAG
chr02	891366	T	891266	891466	AATCTTCATCCTCGTTGGAGACAGGGAGTGGGCACCGATCGCGTGACACCCACTCCATGGGTTCACGAGTAAGGGTGCCTGAGGAGGACTCCTGTGACTCTGAGAGTGTGGCTTCAAACTTTGAGTTCCATAAGGAGCGAGGGGCCTCTGCTCGGTCTGTGACGGCGGCAATCGTTCCTCCATTCTCAAAGCCTGCACCAT
chr02	1838210	G	1838110	1838310	AACCCAAAAAAAAAAAGTTAAGATGCAAACACATGCGAGATCGCATGAACACACGTTCATAACTATGAGTTTGCAACATTATCATATATTAATATATATGGAGGAGCCTGTCAATTAGTAATTTAGtattacttttatttttttaatagataacaccattagcttttttcatatgtttgattatttgtcttattaaaaaat
chr02	2942472	g	2942372	2942572	CAAGGAGTTAAAAATAAGTTTCAGGAAAATGAAGGCGGCAGCAAGAATTGACCGTACTCTTTTCATTTTTATCTAGtacttcctccgttttataatgtaagggtttctaacattaaccacattcgtatagatgttaatgaatctaaacacatatatttatatgaatgtgggtaatactagaaagtattacattatgaaacg
chr02	3215868	T	3215768	3215968	CACTTTAAGAGAATGAGTGAACGAAGAAAACATGGAAGCAGGCAGGGTGGATCAGCAAGTGGCAATGACTACGAGTCTGATGAGGATGAGACTAACAGTGTGATTGATTTTGGCAATCTTTTGCCCCGAGCACCTAGTTCTCATCGGAAACACAGGAGTAGGAGTGCTCACCCACGCAGCGGAGGCCGTGATGATGAGGAA
chr02	3374978	T	3374878	3375078	ACAGGTAGTCTACAATGTTACTAAGTTGTAGACTATCAAGTTGAGTCTTGAAGACCTAATCAGGCCATGATTAATTGATTTCCAAGTACAACTACTCTTATATGGATGGACTCTCAACTTTGGATGGGCCACCGTCACTAAACTCTAATGGTTCATATGCTTTATGTCCCGCTCCTTGTTTCATTCTGTATAAGATGTATG
chr02	4333177	A	4333077	4333277	TGAATTTTGCTGCAGTAGTGTATATGTACGCTCTCCTTTTGATGCCTGTAGCGATGACCGATGCAAGTTTATACTGTCCCTTGTTAGACAACTCGGAACAATGAGTTTCTTCTGTCCTACATCTCCTATTCTCTCCTGCATTTCAAGAGCAAGTGTTGCATGCAGGTGCCATTGTGTTTATGGATGTAATTTTCACGTGTT
chr02	5510146	G	5510046	5510246	TTTGTTTCTATCTTTTTTTCGATTATACAGAAGACACATACACACGCATGCCACACTCACATGTGAATACTTCGCTTGGTTGATACACACGCTCAAAAAAGACGTAGAACGGTGGCCACTCTTTAGATTCATTAGGTTTTATTAGAATGATATGTGTAATAGGACGCTCAAGAAGATGTAGACTAGTGGCCACTCTCTAGT
chr02	5602214	G	5602114	5602314	CAAAAGCTGGGTTGTGAGATGTTGCCCGTTCTTAAAAAATAAGTTGGGTTAGAACGATAAAAAAGGGTTGGGATTTTTTTTGTGTGTTGCTTCAGTAGTGGCACCCGCAAATAGGATTTGCACTTTCTTGATTTGATTTTGTGATATAGGTGATGAAAACACATTTTTTAGCTGTCCATTATCAAAGCATGTGTGCATATT
chr02	7792626	T	7792526	7792726	AGACAAACCCAAACAAAGCCTACACGATCCACAAGTGCCAAAAAAAGCCAATAGGGATCTATAACAGCCTCTCAATCTCGTCGAGTTCTTATTTGAGAAATCCAATGGCTACTAGCTAGCCATCGACCACCTACTCGAGCTTTACGCTGCTAGACTGACAGAGACTCGATTAGATTCTCCTCTCTATTGTACTTATGAGCG
chr02	9521641	G	9521541	9521741	CACCTGGATGTGAGAGTTCTGCTGCAGTTAAGCCTTCTTTACCTTCCGTGACAACTCATGGAGCTAGTTTGCCACCATTTCCTTGGTCGCACTCACAAGCGGGAGGGTATCGACCAGGTGCTGACTGTGGTAAACATGGGTCGAGTAGGAGTAACACCCAATGGCAGTGGGTGAGAGTTGGAAGCAATCTCACTGCTCTAG
chr02	11041677	T	11041577	11041777	GTAAATAATGGCCTCTATATTGTTCTGTATTGGAGTATCTCTCTACTATTTTTTTCTCTGAAGAAGAGCATTCTTTTACCTATTTTTGGTTTTCATAATTTAATGTGATGCATAATTTGATTCTGTTCTTTTTTAGATAAAGGAGGCTAATTTGATTCTGTTCTTGCAATTGTGGATGCACTGCAGGGAATGCATGTGTCG
chr02	11543504	C	11543404	11543604	tgcaaatatgatgttTGGGTTATTCCCTAATTAATTAAGCGAAACGATGAGGTCGTAAAATTCGCTCTTAGTGTTATAACTATATATGTGCACTCATAATCGttataatcagattttttgtcattgcaacatgtagaagataaattttactatgcatatttgtagagtgatctatcatatattaatctatattattgaatt
chr02	12507839	g	12507739	12507939	ctcatgtcttgcccctggttaaatcgccttcctcaatcacaaaaccgggtataacgtctccctcattttcaagaactggtgtaaattgactccttaggtggttttgaaagtgattttatcgtacgtggcactCGTGAGACCCACATGTCAGTAAGAAAAAAAAATAAAAAATTTACACCCACACATGTTAATCATCCTTTT
chr02	13001671	T	13001571	13001771	CGGCACCTTTAAACAATTATAGGTACCGGTTCTAAATAAGAACCGACACCTATTCTAAGGTGTCGGTTTTCTAAACCGTATCTTTAATATATTATAGGTGTCGGCTTTTAAAAAAACGACACAAACATAAATCGAGCCGAGCCGGCAATCGGATGAGCCGAGCCGGCGGGCCTCACCACAAGAGGAGATAAGGTTCGATGT
chr02	14538776	C	14538676	14538876	CGACTCATACATCCAATATGTATGTGCTAACAGCAAATGTTTTCCTTATTTTACTAACAGCGGAAAGACAGAATGTAAAACCCAGGGTTCAATTGCCACGCGCAAGGTTCAAAAGGCTGATCGTGAGAAAATGCGAAGAGATAGATTGAATGAGCAGTTCCAGGAACTTGGAAGCACACTTGGTAAGGCACAATTGTTTGT
chr02	15013530	G	15013430	15013630	AGGCCCTTCGCCCCGCGTTTTTTGCTTTTTAAGACCTTAATGGCCGTGGTTTGCTCGCATGTACATATATATAGGTGCTTTACGTGTTTGGCTGGGTGCCGTTATCATCTTGTAGCCTTCATGGCTTTAAGTTTATTAATTAAAAATTAGTGTTTCGCCAATCGTATGTTTTTGCTGGAATGTGGGATTGATTTTGCTAGC
chr02	15086813	A	15086713	15086913	caaagcctttccgtacgaccacaagtctatgggtaaggcctgatcgacagtttagtGCATCTCAAAACTTTGGACCAGGGGTCTATCACAGATTGAGTGTATCCACTCGCAATTGCTAGTCCCAACCTGTCGACCAAGGGCGTTGTGTGAGTGCTTTAGTGGGTTCCACCGAGGGTCACCATCGGGAGTTTCATTGTTTtg
chr02	17001239	C	17001139	17001339	TCACAACTCATATATCCTCTATATTTTTTAAAAAAAGTTCTTTTCTTAAAAATACACACACATATATATCTCTTGACATTTATGAACCCTGGTGTATTTACAAGAAATACTCCAGATTTTACAACGGGGAGTAATTCTATTTAAAACACATCCGCCCTAGCTGGAAAATTACTTTTTATACATTCAACCACCGAGGAATTA
chr02	17496422	T	17496322	17496522	TGATTTTTAGAATGATTTCTATTATTTCCCATAATTTATACTAAGGAGCTTTAGTTCAATTGTGACAGGACCTCCGCTTTTTCTTATTATCCTCCAGGGCTCATATATGCTTGCGCAGACGAAACTTGTCTTGTGTTAGATGGTTGAAAGTAATATATTCAGGAGAGCCAACCAGACTAGAGACAACACATCAAGCAACAC
chr02	19028733	C	19028633	19028833	CTAAATACTACTTCGTACTCCACGTAGTATACGATATCAAAACAGCACGTAAAGTAGCACAACTTTAACAAACACCACTTTTCATTCTTGACGCAAAATTCATCACCTTGAAATTACTAGCTGAAGTTGAAATCATCAGAATGGCCTTACCTAATTATGCATCCATGAGTTCCTTTTGTTCTTGTAACTTCTAAGCATAAT
chr02	21001933	A	21001833	21002033	GTATGTTTAAGCGCTTATGTTATTTATTGTTGACTATAACCTCACATGGGTACATGACGACATAATGTTCCCTGTGCACTACTTTAATCCAGAGCATGCAACTACAGTCATATGTAGCACAACTTTATCCTGAAACATTGGCTGGTTAAAAATATTTTCCGGCGGAAGCACAATTGCAAGCTCTATTGTTCTAATCCACGC
chr02	21981851	G	21981751	21981951	ATACTTTTAGCATGGTTCACTGGTGCATGAATCTTTCTATTGAATCAACTTCCTGAGAAAATTCTTTCTATTACTACACCATACAACAACTCCATCATGCGGTCTGTACTCTGTGGCCATTTCAATGATATCTCAAATATGCCTATTCTTCTGGTCCTGTCGTTCCATGTACACCAGTAAGTCAAAATGAGATATTCTTTT
chr02	23115034	G	23114934	23115134	TTTGGTAGCTAGATGTGTACGTGGAGCTAGCCACCGTACCCATAGTGTGGTTATTGTGCCCACAGTATTCCATTGCCCATATTTACTCGCGGATAAATGCGTATAGAATTCGGATTCTGTTGTTTAAGAGATAAGGATGACAAATTAGATCGTCCTTGGTCTCTTCATCTAAGAGAACTCTAATTCTGCGGTTTTGTAGAT
chr02	24382074	T	24381974	24382174	aaccggtgtaaattgaccactttggtggtttgaaaggcgttttttttttgctgacgtggcgagttgatcatggttgactcACTGAATCATCGAGTAAACCTCACCCAACAGGGACTCTATCTTCTTTCAACGCGACGAGCTAGTTGGGGGGGGTCCACCTGTCGCCCTTTGCATCTGTTCCTTTTCTTCTACTCTCTTCTT
chr02	24528569	C	24528469	24528669	TCTAATGGTAACAGATGCCGTGAAGTATCAGCGCATCATCTCTGCTTTGGCTTCGCTGTATGGAAATGGTTGCTGGAAACCTTACGCCTATTGCAACAAGCATGTCAAGGGAGTTTttgttgacggctgttaaatacaaaattctcgccgtcaatacctgcataaaaccataaaagtaaaacatccaatatagtgatagga
chr02	25389035	G	25388935	25389135	TTCTGTATGTACAATTCACACTTCGCACCACACAACAATGAATGAAATGAAGATATCCCAACTCCCAAGAAGCTGCTGCTCAGAGATTCTCATGGTAGAAGTAACTGTATTAAAGAATGAAATGAATTATATGGGATTACGAGTGGAGAGAAATATGAATGCTACTGTTACGGTTAGTTTCAACGATGAATAAGAAACAGC
chr02	26478941	A	26478841	26479041	ACACTTGAAGAGGGAGACCCATAGTTGCCAAAATGGCTAACAAAATAAGGCACTACCTCATAATATTCTTGCAAAATGTTAAGTGGCATGTAGATGAACCATCCATGTTGTCTACAATAACGAGCCCACAAAGATGGTATGGTAAATCATAGTAACAACCCATGTAATCGCCAGTGCAGGTTCCTGTGGCTATTTACACCC
chr02	27571643	g	27571543	27571743	aggttcaaaccaaccactgtttgggtattcctggtgaacaacttcaaggcatgctgaagatggggtctgttatgcatgtcttacaattgcaggaaattttgtctgtcacagaagtgcctcttcctcctgatattggccagcttttgcaggaatttcagtctatctttgaggagccctagggactgcgtcctaaacgagctt
chr02	28746716	T	28746616	28746816	TCACTAAAGTTGTAGTTTTTCTAAAATTTACTCTTATGTAAGCATAAATAAATAGTTTTCAAAAATAAATTCTAGAGTATCATAGTTTAGCCTGAGCACGTATGCATGGGAAGCtaccctgttcgtttcatattataaatttttttataacttgtttaagcttgacaatatttatagaaaaatgtacctatgccttgaata
chr02	28875537	A	28875437	28875637	GTGGGCTAACTTTTCCACCGGGAGAAAAGGCAATGTAACTGCCATTGCAAGCACGCAAAGAGGTGGTCTTCACACTAAAGCTTTTTCCATGGCCGATGTTATTCGAACTTCGATCTATCAGATGGTTTCAGCCTTTGAGCATGACATGCGGGCAAATGCTAAAGCATCAAGTTTGGAGAAGAACTGGATCAGTGAAGGAAG
chr02	30010096	A	30009996	30010196	tctaaattagcgtccaaatatccgatgtgacatggactaaaaaattttagccccatctaaacacccctaGAGTCTCAGATTAGTCCTCCCCTCCCGTCCCATACCTAGGGTCTGTTTAGGGAAACTTGAGATAACTTTAGATTCTAAGAAGCAACTGTTTGGTAGCTAGTTTCTAATAATCTGGAAAAGCTCTAAAACCCA
chr02	30153412	t	30153312	30153512	CCGAAACAAGTTGAGGGACCTAAAAATACATTTTGAGAGTTCAGGGACCTAGGTGATACACCAACACAAGTTTATGGaccgcccatgcacattactcttattattgtgaattggtgatccaaacgataatacgataatgaatgtttcttaattttgagttatgagtggtcgtggcttatattttcgaatagagggaTAGTT
chr02	32928214	T	32928114	32928314	GTTCTACAGCTGGACAATGTATTGATCCTTTCTTCTACATTTGGATGCCATAATATCTGATTTTCTTACTGTTTTCTTTTTCAGTGCTTAATTCCTATATTTCTGTCAATATCAACTTACCCGTGTTAATTTGACCAGGGAAAACCACTTTCATTTCTCAAGATTACTCCTGCAATGTTATAGACTTGTAGTCTACTTGGC
chr02	33610653	C	33610553	33610753	GTGGGCAGCAGCAACCATAGCCGTGCGAGCACCCGTGAAAGTTGATATCAGCGCCCCCAGCTGTAACTTGTCATTGCAAGCAAAGCTTAGCCGGTACCTGCACACAGACGCCATGAACAACGTGCCATCTTAAGGGAAAAGGCCATAAATGGTTATACTACCTACCTTTCCAAGAAGACTAAAGGCTAAAAATATTTGGAA
chr02	35397345	A	35397245	35397445	GCAATTCTGAGTCTATCTTCCCATGACAATGATAATGGCCCTTCAACATGAAGATGGTGGTAAAGGGTACCATTCGATATGAATTCATAAATCAACAATGACACTTCTGTCTCTAGGCAACATCCAAAAAGTTTCACCACATTGCGATGGTTAATCTGTGAGAGAATGGCTACCTCGTTTATGAACTCATCAATCTCTCTT
chr02	35758379	A	35758279	35758479	AACCAAATAAGCAATGTAGCTTCCCGCCTTCTCCTTTGCATGTACTGCAAATCCATATATAGCACCCATGTACTTATCCACTACAAATGCTACCATTATCAGTCAATGTAACATTGCATTCAGGATATCGAATTGATTATGCTTCAATTCAACTAAATAATCTCAACAAATGAAATCACTGCAAAAATAGAAATAGTTACA
chr02	36572369	G	36572269	36572469	GCCTGACAGGTGAACCATTGCGAGCAAGCACACGACTGCGAGAAAAAACCACATTCATCCAAGCCCCTCCACGCTTCTCAGATGGTCTTGAATATGGATCGAAGTAGAAATAAGCAACAGGGCTATTCGAAGAATCTTTGACACAGTAAAATTTGACATCACTATTCCAAACCTGAAAAAGGTAACTCAGTGGTCAATAGC
chr02	36693040	G	36692940	36693140	GCAGATGTTGTAGTTGCAGGGTCAGAGAGGACTGGCGAAGAGATCGGGGTTGATGCTTCGGAGATGGATTGATGGGAGATGGACACTGGAATGCAATAGCGGTTATCAGTACTGTACATACATAATTGTCGATGACAGATTGAGGCCGCGTGATGTGGACTTGTTTTGGGAGGCTTACAATTGTATGTTGTCGCATAACAA
chr03	593041	G	592941	593141	TCTTCGACGAAGAAAGGAGTCGTGGCGTGGTTTAGGGTTTCGGAGGCAAAGCGACGATGTTGAGATAGAGGCTGCTGTTTTAAAACTATGGAATTTCACAGAAGAAGAATCCCTTCCATACTTTAACTGGTGGAACAAGATGAGAAATTTTTTTTTTGAAAATATACTATTTATTATTTTTCTATTAGAAATATCCCGGAT
chr03	1271779	c	1271679	1271879	ccggatgaggagatgtgagttgatttgttgcgctaggcacaaaacaaagtttaacgtgttatgcacgattgagtagcggcatcccgtattctttagtagacgagggccgaagtttccctgatgctcagttcaaagagaatccttctatgtgacatgaggtacccctagttggatttggaaaggccttgtcacaaaccttcc
chr03	2467820	T	2467720	2467920	CTGTTTTGTTTGCTTTGATCTGTATGTGTATGGTTTAGAATTTGTGTATACTACCTTTTTATACTCACAATTAGTAAGCAATCAAAGAGATTTTTGTAGATATGACTTTTTTCAAGCAAGATATAACTTTTGTGATCGCACATCATGCTTCAGAAGGATGCATCCTTGCAGATTTGAGATAGCTCTACTCTATTGTAACCT
chr03	3416807	T	3416707	3416907	AATGATAGTCTTCTGAACATGGTTTATGCTCGCTCGTTAGCCATGTCACAGATGATGCAACTTGCAGGAAATATTTCTGTTCTTGAGCAATCCTGCGATATGTTCCTCTTGTATTCTGCTCAACTGTGTGGCATTCCAAAGCGTATTGCGCAGAGATCTCATTCCGGTTTGACTGCAAAAGCTGTCTTAAAAGCCTCCCAG
chr03	3469643	C	3469543	3469743	AATGAATCTAATTCTCTACAACTTGACTTGTAGCGGTTAAAAAGATGAACTCAACATTTTGCGGATACCTGGTGTTGCAGTCTGGCTATGACTTCCAAATCTACTTAATTCCATGAGCTCTTTGAGTATGTCATCACATCCACCAATACAACCTATAACAGCATGAAATATGTCCGAATCACCTTAGTATGTAACCAAACA
chr03	4696197	G	4696097	4696297	TAGGCCTCAGGTTAAAGGGAACTGCCCCACACAGACTTTTGGGCATTGCTCCAAAGTCCAAATGGATGAACTTGACAGAAGCTCCACTCTAAGATGCATTGCTCCAGAGTACAAATGGAAGAGAAGATCCACTCTAAGAGGTGTTTATCTTTTTTGAATTGTTAAACCATTCTCAAATCTCAAGGCTGCTTTCAAGGCCAC
chr03	6340232	C	6340132	6340332	CAGGTGATTGATCGATTAGTACTCCTAACGCTGCTGTACTTCTCGAATAAACATTGGGTTATTCAAAATTGTTGGAGTAGTTATAACTGGAGGAGTCATACAATTATTATAGGACTGTGACCTCGATCAGGATGGTTTCTAACTCTGTTCCTATCAGGTAGCCTTCAACTCCAACACAATCTACACTCTGATTGTATTTAC
chr03	7008532	G	7008432	7008632	AGGACAACATGGCCATGGTTTGCATGAGGAAGTTGACAATTCTCCAGGACCAGCCCAACAAAACAAGATGGTACATCAACCTAACCACATATTTCCATCAGTATTAGATCTTCTACATGCATGAACAAAAAAGGATAGTGCAAAATCTAAAAACTGTACCTTTGGAGAGCAAAGGGCGCGGCGAAGGTTTGAGAAACAGCC
chr03	8258886	T	8258786	8258986	AGAATGTGGCAAGGAACCAGGAAGCAAAGAAGGATCCGAACCTGAAAAATCAGACAAACTTAGCATCAGGAATTGACCACACCTATGCATAGCCAGAGACTATATCCTTTTGCCTATTACACAAATTATACATGAAAGGTTGACAACACATTAAAGTCACCTAAATGATAAACTTCAAATCATCCAATCCTTAATAAATGA
chr03	8994393	G	8994293	8994493	TCTACATGACCTCTACTTAATGGCCGAATGCCTCTATGCATGCTGTAAAACCTTGTTTCGCGAGAAAGGGTGTCCCATTTTTGCTCTGCATTCCTCACTAGGCATGGAATCTACGCCCAGGCCGAACACCACACACGTACCGTAAAAAGCCCTTAGTGTCTTTTTGCGGCATGCATCAGAAGCGCTCAGAGGTAGAACCGC
chr03	10208990	G	10208890	10209090	CATATGATAAAGGAAAACATATCGATCTCCGGTTCAATTTGTAGCTATATTAACACATTTCTTAAAAAATCTATGGGTAAATTGGAATGGTCTATACATGGTGCATTACATTTTTCTAAGTTTTAGGTACTGAGCAtttcaataaacgatgtcggtgatatgagcccgggagtatcacgtctagagggaggaggccgccct
chr03	11654988	g	11654888	11655088	tgtagttggtacatgtagaactcgaactgctcccacatcaactcgttcatgaacaaagtggagatcgatctcgacatgcttcgttcgttgatgctgaactggatttgttgaaagatatacagcactgacgttgtcacagtaaactaaggttgccttggagggtggagcatataattcatggagtaattgtcgaagccaaga
chr03	12549980	C	12549880	12550080	TTTTTATTAATACCCTCTCAAACAATTGCTCCAACCAATGGACTGTCACCATGTTCTTCTTATGCTAATTCAGATAATTCTGTTCAATTGTATGATAGCTCAGATGATATCTCCAATATGCATGAAACAGATCAACATATTCTCCAAAAGGTAGGAGCTCTCTGTTCTCAGTTGTCATGAGTTTATATCTCTTACTTTTTT
chr03	14198826	T	14198726	14198926	TGTTTCGAGCACGTAGCAATGCGAGATAGAAGATTATAGCGAAAGAGTTAGCTCAACCTATCTACTACTACCCTTGGAAAGGGGGTGTGCGTGGTATACCTGTTACGACTCCCCTCGAACTGAGCCATTTTCATGATTTTGCAATCAAAGAAAGTTCCATACTTTTTTATTCCCAGTATGGAGCCAACGTCGCTTCGCTTT
chr03	18197206	g	18197106	18197306	GGATGGAGAGGCATTTGGTTTGGAGAGTTGAATGGAGAGTCTGTTGGAGGAGTATTTTTAGTTCATTTGCCAAATTTTTAACTTGGAGAGCTGagggggtgtttagatggggctaaaactttttagtccatgtcatatcggatgtttggacgctaatttggagtattaaacatagactaataaaaaaactaatttcataaa
chr03	20179140	g	20179040	20179240	attttggacatattggagtgtattgagagtgttcgtggcaaaaactcacatcgtggcacacgcggcgaacttttgtcaattaatgccgatattggcatacgtgtgtgccatgttatatacataaaccaaaatgttcaaaaagcaccaaaacttgagttttggatatattggagtgtattgggtgcggtcgtagcaaaatct
chr03	22964889	C	22964789	22964989	tggatccaaacaccaccttaATCCGCCGCTCCTTGGCCAAGTTCCAAGACAGCAGAGGCAGATCCGGGGGAAAGGGAGCAATCAAGCTTTGCAGCATCGCCTACACTTCCCAGATCATACAGAGCAGCTAGAAGTTAAGGCATGGCAGGTTGTCAAACCAAAGTACTAGTAGAGGAAATGTGATGTAACAAATCCTACCGT
chr03	24637444	C	24637344	24637544	TGCCCGAGTAGTTCTGCCTGCCGTTTTGTTCACTCCACGGATTGTTTTCTAAAAAAATGATTTAAAGGGATGAAGAAATTGTGAGCGTGTTAAAATTGAACGCGAAATTTTACGGTTGAAACCATACATTTTTTATCATCGTACTATCAACTGCAGTGTATCTCTCTGTGGATAGTTTTTGGCTTCTCAAAGGATAAAGGC
chr03	25173117	C	25173017	25173217	TAAATTATTACATATAACCAATCTAAAGAAAAGCGTGATACCTCCAAGTTATTACCTATCTATGTGTTTGATACCCTCCACAAGCCACAACCTAGCTAGGCATGCACTTAGGATATTTGGTAGCCTGTAGTAGCAGGGCTCGTCCCTATAAAAATGTTTAAAACAAAAATAAAAAGAAAATCATGCACATGGTGCCCATGT
chr03	28179515	A	28179415	28179615	GATATTTTTGCTATATCTTCGTCGCCACTGACTTGCACGCGCTTTTTTTGTTGAGACAAAATGTCTTAAGGGCACGTTTGCGAAGGGTGAAAACGGAGCGAATTCGAACGGATAGTGGTCATACTATATCCTAACCCATATTTTTTTTGAGTGGATTCGGAGCAGATGCAAATAATGTACGGATGCGGATGCGGAGCGGAT
chr03	28613266	G	28613166	28613366	GGAGGGGGAGAGGAGGAAGAAGACGGCGGCGGCGGCGCCTCTCGTGTCGCCCGTGGGGAGGGCGACGCGAGAGCCCTTCTTCAAGTCCTTCAGTGGTCGTGGTGCAAAATGAATATGAGGCAATGGATCTTTGATTTTTTGAACAGGGGTACAGATATCCAAAATACAGCCCTCGCTGTTACTATTTGGCACATTGGGAGG
chr03	30531192	C	30531092	30531292	TCGTGCCCTTCCTCAAGTTAAACAAAATACTTTTGTGATTATTTTAAGTGAGTATGGAGTTTATTTTGTATGATCACATAATGCTGACATTGACATGTGCCGCTGCAACAGTGTGAAATTTGCTATGGTGTTGAAAATTTCAAGAACATTTTGACAACTAATATGCTGTCTTACTCTCTTAGACTGTTGTATATTCAAATT
chr03	32754888	A	32754788	32754988	ATCCCCTAGAGATGTTATAAGGGAAGAGTTGGGACCAAGAGAGATGGGGTCGGATCCTAGTGACTAAGGAGGGACTTCAACACATTTAGTAAAGTTCTTAAGTAACCCGGAAGAGAAAGGAAGAGAAACTACTAATCCGAGTAGTCGATAAACTTGTAAGATCTTTCAAGGACAAatagagaaatcaccacaacaatagga
chr03	33541593	A	33541493	33541693	AAATCCTTGTCAACTTTGAGACAACTCGCAGATGCAGTATCTGTCCATAGTTTTCAGTCATATTGTACTTTTGAGGAAATTAGATACTTGAGACGCTCCAAGGGCGGCAGTTTTGCCTGGCTAATTGTGATGTTCATCATATAGTGTTGCTTTGAATCCCAGATCATACGAAGTTATTTTATTTCCATTGGCTTAGTTTGT
chr03	34465621	C	34465521	34465721	TGTCAAGCATTCGATCAGCTTCATCAAGAGCTAAGTACTTCACCATTTGCAGTGATACTCTAGCCCTCTCCAGCAGATCCATCAACCGACCAGGAGTTGCCACAAGGATTTCAACGCCCCTTTCCAATTCCCTCAACTGCAATAACAGATAAAGCGTGTGTTCAATAGCTATGCACGTCACTATGCAAAGGATGGCTGTTT
chr03	35236508	C	35236408	35236608	ACCACTATCATGTTTAAGGGCCAACTCAAATGGGCTATATGCAAGTCACTATCCCGTTCAGACCTCATTTAAATGGGCCGCATCTCCCAAGTCAGATGTGCCGTTGGAGTCCTCTCCGACGGCATCGATCTTCAGAGTTCAGAAGGCTGTTACTTCGGCATATGTGTTCATCATCTCCCGGTTGGCTCAAAGTTTCTTCCA
chr03	35927051	G	35926951	35927151	AGTTGCAGGGGGACATTAGCAACATCTGACAAGTCAATTTCATTCTTCTTGCGACCAGAATTAGTTTTCTTTCTAGAACTTACATTGACTGGAATTCCCTGTGCACGGCACTGCTTTGCTCTTCGCCAAATATCTTGCACTCTACCCCTTTTGATATTGAACATTTCAGCAACTTCAGTTGTTGCTTTTTTTCTTAGTCTT
chr03	36739345	g	36739245	36739445	GGTTGTTCCTTCTCTATAATAGAtactccctccgtttcataatataaatcattctagtattgcccatattcatatagatgttaatgatatatatatatatgtctggattcaataacatctacttcctccgtttcatattatactagtaagactttttagcatatgtctagatttattgacatatatatatatgtgcctaga
chr04	306447	C	306347	306547	GGGGTGCAGTAGTGGCTGAGGCCCACATGGCCAATGTCCGCATTGCCTGCTGAACCTGGTGAAGAGCGCACCTCAACGTCGTTGCTTACTAGGGTCGAGCCGCTAGGAAGGAGAGGAAAGGAAGATGTACTGACAACTGGACTCCACTGATTTTTTTTTGTTTTCTAACTGGGCTGCCATGCGTATGCCACATAGGCTAAA
chr04	399904	A	399804	400004	TCTCTCTTTATCTCATCATCACCTTTTTACTATCTTCTTTCTTTCTTTCATAAAAACAAAAACAAGAACCATAAGATAGTACTATACTGTATTAATTATCACTACTAGTAGTACTTAAAGATTGTGACCGTTTGTTAACAAGATAATTAAAATTTTATAGTGTtactttttccgtctcaaaatatagatatttggtcttat
chr04	1309416	G	1309316	1309516	ACCCTGCTGTCGACAGCTGTCGATGTCTTTAAAAAACGGTCGATCACCAAAAAAACACTATTAGTTATTCAAGCTCGATGATGTCACTGGCTACACCATTGTCCTATAGAAACTAGCTGAGCTGGGACTGGGAAGAAAAACCAAAATTTTGCCAAAATGGTCCTTTTACAAAAACTTATTTGAAGAATGAACTGTTGCAAA
chr04	2005230	T	2005130	2005330	ATATACAAAAGATTAAACATCGTGCCACTAGGGATATGAAACACCTACAGCTACTATATAATTGGCACAACTACTCATCGCAGTGAGGTCCACTTCATTATTCCACAAAAGCCACAAACCACCAGAAGCATGGACAACAGGAACTATATAGCTATTATCTACATGAAAAGCATCAGTGAGATCAGAGGAAGTGAAAGAATC
chr04	3552480	A	3552380	3552580	AATAGGGGGATTAATCAATGTTACAATAGGGGAGATTACCCCTTTGAGGAATTGACATCAATGTGATAAACACATTATATTCAACATGTTGAATTCAATAATGCAATGACAGTTGCATCAATACGGAAAGTTTTGTTGCTGAATAAATAAAAAAGGGAGGTAACAAAACAATTGTAATCATTAACAAACCAGCCAGATATA
chr04	4117759	G	4117659	4117859	TGTCCGTCCCTGTCGGAAGCTTATTGGTCCGTTTACCAAGGATGAGTACTTGAAGTACTTGACACTGCAAAATGGGAAAAGACAAAATCATGTGTTTGCTGTTCTAAACACCGATATTCCTGCTTGCATTCATCCCGAGCAAGCTCCCGAGCTAGGAAAAAAAAAAGAAAAAGAAGGCAAAAGCCCCATCCTCCGATGAAG
chr04	4553353	C	4553253	4553453	ATTGAGCATGACAAAACCCATTACTAATTTGCACAGACAGCATATAGACTCGCCAAAACCTGTTAGTGGAATATAATCTTATTAATATATGACAAGCCAGCAATCTAAAATTCTAATGGAACAACCCGAACAATATGTCATTTAACTAATACAAAAATACTGAAACAGTGAGACCTCAAGCCAATTTGTAGCTACACATAG
chr04	5533713	A	5533613	5533813	AAATACTAAGCATCAGATTTTTTTTTCTTTCATTATTTTTGTAGTGACATCTTTTCAAAGTCATTACTGTATGCACAACCATCCCACAACAATGCACGGGAATTCATCTAGTAACTCTATATAGTTGATCCCCACTAACAACAATTAATACTAATTCTCTCAACCCTGTTGCAGCAACATCATCTGAATTACTTTAAGCCA
chr04	9424573	C	9424473	9424673	tacacacataaacttccaactttttcgtcacatcgttttaatttcaacctaacttttaattttgccatgaactaaacacagcctaGATCTTTTTGCCGATCAGGGATTAGGTACGGTAAATTCAGTGGTCCATTTTCTGTATGGGACCTAACGTGCTGCAGATGGCACCAGCCCATGAGCCCAGGTCCATTTACTAagccc
chr04	10716260	t	10716160	10716360	gttgttgatgactagtgaagaatttggcaatgaggctggatctgttggaaagaggactccgagagcttttcatcaagaactcacaggccgaaaacggaggtcgtatgcagatttggctaccgtttgaattcagcaatgtagtaggtggccgaatcggattccagcacttggattacttgatcgtgatgtcttcttgttgat
chr04	12493056	C	12492956	12493156	GTGCTAGGAACAAAAGAAAAGACCGACTTAAGGAAGACAACAACGTACGGTCGCTAGATGAGAAGATGGAATTGACTAAGATAATGTCACTTAGCTATGACAGTGGCGTTGATCAATGATGTAGAAGAAGGAAGATGGGAGTAGACTGATACTCACCAACGATGCAACCGCCATGGACGACGTGTGGGGATGACAACTGTA
chr04	12736528	g	12736428	12736628	atgaaaagcgatgcaatgattatcttgatataagttgtctcatacttgctactatgtcccctgagcttcaaaggcaatatgaggcattggatgctcatacgataatcacgggactatgtaacatgctcatacgataatttgcgtgcaggcttgcagaaggtaatccagtgagcccacgtgtgatcaaaatgattggttaca
chr04	14775066	c	14774966	14775166	agggatcttccggctagcttcacgaggtggtgggctaaacgacttctaattatttgatattaggtcattccctaatattcgcatctttaagattttatcacgcattgtatttgttataaaCTTTGTGAGTATTCCAGAGTCAGTCCAAGTACTAGAGCAGTAATATTGATATTTTAATTTCTAATATAAAGCATGAGGATC
chr04	15439827	a	15439727	15439927	ctgactacctcaactgctagttggagagtggcttggctacctggactgctcaattctgttcagaccatcagcctagttaccatagacttgatgagaaaaaataATTTTCTATGTCACACCATGCcccaaaaattcacaaaccagaattccaagcagaacgtgcattaaaccactatccaggaacagctagggtagttgaac
chr04	16024751	G	16024651	16024851	AAGATTGTACTCCTGTTGGTGTTGAGAAGTCACACACTCTTTATCTTTTTGACTCAACTGAAGAGCTGACCCGATGGGAAAAATTCAACAAAAATAAACCGTACTTTCCATACCAATTCCAACTTCGAAGATAAGTATTAATTCAGCACTCACCAAGCCTACATTTCTGACTTTTATATACATGCAGATGGGTGAGCTGAA
chr04	20079706	G	20079606	20079806	CGATGGACGATTGATTTCTGCGGCATGACTATCAGAAGTTTCAGAGGAGGACATGCATGCTATATTGCAAATTGCAAATACATGTTCCTGATTGCTGGAGGAGATCAGAACCCAGAAGCAATTCATCAGCCGTCAGTCGTCCCATTCATTTTAGGTGCCGTTTCCCTTCGATCCAAAGGCACACAAACAAAGTGTCAACAC
chr04	20515748	g	20515648	20515848	ggagggagtaTATTATGAAAAGTAACCACGCTAGTGTGTATGGTAGCCGCGGAATGGGCTGGCCTTCGGGAGTTCGGGATCTTTACGGATTggaataagtgcactttaggtctctctattcgtcgctcagtccgattttcgtccctgaactgtaaaaccgggtacaacccatcccccaacttacgaaaaccggacaaacga
chr04	23216408	A	23216308	23216508	AGGAGAGTAAAAAGGACCTTTTTACAAATGGAAAATTTTGTAAATTGTTTCTAAATTAATAATTTTTGGTTTGACCATTTTCATCCTTAATTTCTGACATAAGGTCTTCATCACTGTCTCATATTCATGACTAGCTTAGTACCTCACCTACCTAACTCCGAGTTTGTTCGCCGGTTAATTTTCATTGTTAACTTGCTTGAT
chr04	25178986	A	25178886	25179086	GCATTGCGTTTCTGCCAAATTAACCACGAGACTATGCATGATTACTCATGCATAGAAACGACGTTGGTCTCGCTTCGCCACTATACGTGGCATACTTGTAACCACACAGTCCTTGAAATCCTCGCTAGTGGGAGCGAGTTGCCATGGCAAGTATGGGTCCTCGCCGCCGGTCAAACCTTCGTTGAGAAGGAGCATGATATG
chr04	27831129	C	27831029	27831229	aatcctttgttctatacatatattcatatcctatttctatgattttcctattcctatatttttacaatcttgtgctctgaacgagcccTTAGCCTATATCCGCATCCATATAGGGTTTACATTTGCGTGTAGAAAGTGCCACATAACCTATCATATATATTACTTACAAAAGATCTGTATTTATGATCCCCTATGGGAATG
chr04	28273204	G	28273104	28273304	AATATGGTCCCTTGTATCCTTGGTGGCTTTCTTTAGCGGATGGGGTAATTGATGGGGATCTCTACTCCAACACTTATTACTTATCAGCTACTATAAAAGAGGAGTTTCATCCGTTCGCCTTTCCTACCTCCATAGCTTGCATGGCATATACTTCTCCTCTCCTGTAACAAAACTGAATAACAAGTAGGGGTGGGCAGAAAT
chr04	29509191	T	29509091	29509291	GAGAGACACTCCATTTTTGCCTCTTCTCTCTCCTAATTTGGCGCATCCGCCACTTTTGGAGGGCCTGTTAGCGTATCTGCTGGAGCTGATTTTTCCCCTTTTATACGGCAAATGAAGGATGGATGACCGGTTAGAGGAACTGCTGGGGATGCTCTAAGTGCATTTTCTTTCTTTCTTGAGGAGGATGCATTCAATATCACC
chr04	30526238	G	30526138	30526338	ATCTTGTCTTTATTTTAAGTACAAACTAAACTCTGTGTTTATCATGTATGTGTATATATGTCTTTCAACTCCCAGCTCCCTTGTATGTTAGTAGTAGCTAGTCCAGAACAGGAGGAATATAATTAATAGGAAGTAATTCTATATATCTTAGGAGtactatagagtgaaaactcactaaattctaaaactcaacatgcaaag
chr04	31761392	t	31761292	31761492	AGCGCTCGGCTGATCGGGAATGCGACAATTTATAGCAACCGGCTCCACCACCACTCGCGCACCGCGCAATTAgaggttgatttgcaagtaggcttatccatgaacccgtttatagacaaaattagtgcgtaacccgtggatttgattagcaggttatctgttaatttgacttataaatgggtctatagatcgatccatttg
chr04	33207733	G	33207633	33207833	TAGTCTCCTGTTGTTTTGAAGACTCAACAGCATTTGATGCATATTCTTGAGTTATGCTGCCTGAGAAGGCCTCCGCCATATGATTCTACACAATTTACAGGATAATACCATTCAACAGATTAACACTTGCAACCAAATAGAACTGATTGCACAAGTAACTAGATGAGCAGGTTACCTTTTGTGCAGCTAAATCATAGTGGG
chr04	34825318	A	34825218	34825418	AGGAGAAGGTGGAGAAGCTAAATCTCACATCAGAACAGATCAATAACCCTCAGTCCGCTTGTGGCAATGTGAGCATGACTGCTTTTTAATTAAGTGTTTTATTTTTTGCCTTTGGTCCTCTCCCTGTGAAAATCCATAGTTTCATCCTGTGAAATGATAATTGCAGTGTGGGTTGGGCGATGCATTTCGATGTGGTACTTG
chr04	35189834	A	35189734	35189934	TAACTAGTAAGCAATTTTCACTATTTAATTGATAACCACTATAAACTACCTTTTTTTTTGGCAAATATGATAATGACATAGGCTGATGATAACAAGGACAACAAGTTGTCACTAGAAGAGATGCTGAACCACTACCTATCTTTCTACAATATTGTTTACATGGATGATCACTATGACTACGATGACATTGGCAACAATATC
chr05	171155	G	171055	171255	CAACAGAAAGCGAAGCCGCACCAACCGCATACAACCGGTACAGAAAGAAATATGGAATGGCAATGAAAGCATGATCAACAAGTGCAGTTGCAGTTGCAGTGTAGAGCAGGCACCGGTCGAATTCGAGCCTAATAACCTGCGCTTCTCTTCTCTTCTCTGCTGTGCTTTCCATCCATCCACTCCCACGAACCGCACCTCACC
chr05	541225	T	541125	541325	GTTTTTCCCCTTCGACAAGCCATGGCTGGTTGGTTCTTGGATCGAATTTAGAGCAGACCATTACCGAGTTGATGTCAAAATTTTACTATTCTCCGACGCCTCTGACTGATTTTATTTTGTTATCTCGTCCAACTTCCGTGACAAGTTTCACAGCATGCTAGCATAGGGTTTATGAACGGAAATGAAGATATATATATTCTT
chr05	1985998	G	1985898	1986098	ATACTTTTGAAAATCCTGTATTATATAGTTACAACCCACTAACATCATTTACTCTTGTAAAGAAGCCTATGCGTACGTGAGGCCACACATCGAGAAGCCAGAAGCTAAACCAATAGACCAGTAGAAAGTTGCTTTGTATTTTTTTCAAAATTCTTGTACCCCCTCATGTTCCTACTATGTGACACCATTTGTCGGTGAACC
chr05	2338894	g	2338794	2338994	CCTTTTTAAGGCAATGAAAGCTTGGCCAGGCGATCTTTTGTTTCTTACAAGCTATTTAGAATAATAAGtactccctccatattaaaatatgtatgacgccgttaactttttaatcaacatttgaccattcatcttattcaaaaaataatgtaattatcatttattttattgtggcttaatttatcatcaaatattctttaa
chr05	3868405	A	3868305	3868505	agctggagctatgccaaacaggcccttaCTAGCAGCAATTGCACCATATATGATAAACTATCAGATAAAGAAAAACTCACAATAAGTTTGTTCCATGAGAAAATTACCCAGAACTTCAGAGCTTCATATGGTCTTATAATATGTCTCGCTACTACATAATTCATCTTTACAGAAATCTTCCTTTATTTTTACAAAGTATAA
chr05	4197541	a	4197441	4197641	aaccctaggtgtaatactattgaaagtacgtgtatgattttttctatattttttggtgatattttttagttggtgtgcacgtgtgtacacgcgagagcttatgtacgtatgatatgttgccACTAGTTCTCAATCCCTCTCGTAGATGAGGTTGTCTTAAATGGATCACATGTTGACCTGTTAGAGATGCCCCGCACGTTT
chr05	5320109	A	5320009	5320209	TGAGATCAGGTGTTCCATCATGATGCATCACGGAAATATCAGGAGTCCTGAATATAATGAGAGAGAGGATAAGCCAGCACATCTTTTTTCAAAGTTGCTTATCTCATTTTGGAAAATTGCAAAGCCATATGTTTTGCGCCTAATAATTATTATGGATCAATGGTGAAACTCCAAGTGATCCTATAGATATTCTCAGCAAAT
chr05	6654752	G	6654652	6654852	CGCTTCGTGCTCATCGGTCTTTGAACGATGTGGTGGTGTGGATGGATAGGTTTTCAGCATGCATGAATCTCATGTAGCTTAGACGTCACAACAGTGGCGTGGGAATGGTGTTGATGGGAAGAGGAGTTGGTGGAGTCAGTTAGTGTATCTCCTAGCTAGATGAGATTAAAAGAATGAAGAGTTGATGAATACAACTGCTGT
chr05	7891113	a	7891013	7891213	ttttcagtctttatttttaagtcgcttacaacacctatataaaatttttatttataaattatttttggtttacaaatatgccgttccgctgaataagcgaaacgatggAGTCGAATATGGTACACAAACTGTAGTCGGCTAGGCCAACGTTTATTAGATATTTTATCATCTAATTAGTATAGTTATGTCCTAGGCAGGGGC
chr05	8436830	C	8436730	8436930	CTCATGGTGACAGCGATTCCACTTTTACTATCCAATTAGAAAACGGTGAGTTTATATCACCGAGCTAAGTTAAACATTGCTTGCATTCTCCTTCCGCTCACTAGCATGTTACTGGATCGTAGTCTCATCTCATGTCACAATCGTAGAAGTTTTTCCTCCGATCGAAGGTTTCCCTCTCAACTCTTCTAGCTAGTTGGTTAA
chr05	8676749	c	8676649	8676849	tccatcagtcggcttcttggattgggcggcatattgttcagcaaattgcttgtagatgaagcagtccttggcatcatgcttggaattggtgtgatgagtgcatggaccgttcattatctcatcataagtattgactcggggccgctggtgttggaaatttgaagtggtaccgacgaggtcctccggcttgcgcttgcaatc
chr05	9167952	A	9167852	9168052	CGCGGCGGAGGCGGCCAGAGATGCGACACTGAAGCACAATCTTGGTGAGGGTGGGGTTCTCACTCTCTTTCCTCGGTCCTTCCAACAGAGAGGTGCACCTAGCGTCGTGGCATGCTCTATTGGGATTGGTTCACGCAGTGAAGTATGTACGGTGTCACACAGTTAATAATAACTACTAATACTTTCACCTTTTATTTAACT
chr05	10555684	t	10555584	10555784	TTTAGACTCAAGATCTCTCATGATCTCAGCCTTTCACACACGTTACCATCCCACCTACTACACACGTCTAACTTGGATAGTGATGCttctttttaactaatcctaaagacaactttagtcgtggttagtgttaccagcccatactaaagatgtatttttattaccggttgataacacaaaccggtgctaaatatatttcgg
chr05	11023570	a	11023470	11023670	taacggaatgggtatgtaagggatccaaataaaaactcaggggtatataagagatcaaacaaatttcaggggcgtagaagggattgggtgaaattacatgagcatatagggaattggccctaaaAAGAAGGGCTTGTCACAGTGCACTTTCAGTTTTAGCACCATGCGGTCACGTGCTAACAGAGTCTAGCACCATTGCAC
chr05	11673020	G	11672920	11673120	ACTACAAGATGATACGAGCAATGTGTCGGCTTTCTTGTAGTGTGTGTGACAAAGCTGAAGATCAGGCTGGCCAGGCAGCACAAGTAAGGCGCAAAAGCAAGTTCAGGAGCATTGAACAGCTGAAGGGACATTTGTTCCATCAACATAGGTTATACATGTGCAGTCTTTGCTTGGAGGGGAGAAAGGTGACATTCTTGACAA
chr05	13552100	C	13552000	13552200	ATTATTGTTCATCTCATCCTGGAGAGTGGCAATTGCCACTCCAGATGATACCACTGCTATCTGATCCACTAGACTGCTACTGAATACTTCTTTTCATCGCCATTAGCTCTGGTTCTTCTGGGAGCTTAGCTAGCCTTCTTCAGCAACCTGCCAAGTGTGACCTCCTCACACAGGAATTATTGAAGCTACTTGATTGTTCTG
chr05	14017497	G	14017397	14017597	GTATAGGTTACATGAAATTGGACGGTAGGGAATGGTACGTATATATGAAGCTAACGCCCACAAAAGGCGACAGCATATGGTTGTTACTGAGAGACCAGGGGCGGTACCACCCATTAGGCGGGGTTGGACGGCCGGCCCAGCTATGGCCCACGCCGCCTCAACCCACCATATCCTTCTTGGGCCGCCTACCACCGCATCCAA
chr05	15000060	T	14999960	15000160	ATAACCACTTGGTAACCAAAGTCTTTTAAGGAGTTTAATGTCCAATGACAAATGATAGGCTGGGGAAGTTAGTAAAATCTTCCGTGCATGCTGGACAATGTTGAAATTTTCATCCTGTTTCAGTAGCTCATTAAAGATTATTATGCATGCCTATCAAAATCATTAAATTAATTAATGAACGGCATTGGCAGCGTGTGGGAC
chr05	15105097	T	15104997	15105197	ATCCTTCAGAAGTCCAAGACATGGGGAAAATGCCAAAATCCTTCAAAAAATGAAAAATTCAGGGATTTGCACCTGGAGGCTGCACATAGTTTTAGAATCATCAATTCACCATGAGCAGTAAAAATACATAGCATGAGCAATAGAGCGATAGCTCAAATTTTTGGAATTTGGAACTAAATCGAAACAAGTGCCAAATTCGAA
chr05	17641303	G	17641203	17641403	AGGAGACTCGTTTGCATGTGTGTCTACGGTGTAAGCGAAAAAAAATATTATACCAAAATAATATGGAGTTATTTTAAGACCAAATCAAAACAGTGGCTTTGTGAGCGCACAGACTTGTGTGCCTATAAATTTTCTCAAGGAAAAAACAGCACTAACTTTTGAAAGCACAAATAACTTATACCAAACTAGCCAAGCGCCCGT
chr05	18562854	A	18562754	18562954	GCCCTGCAGTTCTTCCCTGTTGAGATGCGTCCCCCCCCCCCCCCCCCTTCCTTTGCTTTTGGTGTCTTTCCTATCATATGTCAAGTAACGTTAGAACTCTATCTATTATGTCCTGGAATGTTCGCGGGCTTGGAGACTTAACTAAGCGCCCCATTATCTTTAATTCAGTTAGCTCCGCTGCTTTCTCCGTTGTCTTATTTC
chr05	19001429	A	19001329	19001529	ATTGATTAATATCAAATACATGAAGCCTACAAACCTTGTTGGTTATCCAAAGTTTTTCCTTGTCAGCCTGCAGCAGGTTCCAGTAGTTAAGAATCATGTGATCTTGCAGGAAGAGAAATCCATCAGCACCACCGTATCTCGCAAACACCTTGGGCAGAAACCTAATTAAGTTACACAATATTGGCAGCACGATTAGCACAT
chr05	20001483	G	20001383	20001583	GTATTCAACCTTTGATTACAGTAGTATTCAGCATTTGTTATTGTTCTCAAGTTACAATGCAGACTGGGTTTCTCATTTGTGCCGTGCTGTAAGCCTGTAAGTCGTGATATCCTAGTTGGTTCACACAAGTTATGTGTAGGTTATTGCAAAGTATGTGCACCAACCTGGGGAACTCTACTTTGGGACTGAAGAATACTTCAC
chr05	20781275	C	20781175	20781375	ATGTGGGGCCCACGTGGATCCTACGCTGATTCAGCCGCCACATCGGACAAAACCGGGGCTAAAACCACTGAAGGACTTAAGTGAACGGTTTTGTGTAAGTCGAGGGACCTTCGGTGTTCTTTTTCCACACAGAAAAGCGCCTCCGGGCTCCCGCTGCTTTGTCGCGCTCGGTCATCGGACATCGGCTTTGACTGCGCGCCA
chr05	21014408	T	21014308	21014508	AGGAGAGTTTAAGCTGCCTGGAAGGACATCTTTGACTACTACGAAAGGCATCTGTGATTTAAGGATGGTATTGGCACATGGCTCTTGCTGTTGATGAGTTTTCACACAAAAGGCAGTGACCCCATTCCTGGCCTACTTACTGATAAAGTTTCTTCCCAAAATTTCCTGACTATACCAAATAGTGTGATCCTATATTTGTAC
chr05	22002239	A	22002139	22002339	AGTGAAGATGTGCTGACAGCACAATGTTGTTAAGAGCATCTTTCTGCTCAGCTTTTGAACTGAAAGAAGAACAGCAATCCAAACAAAGAATCAATGCATCAGAACATAAGTAAAGAGTGACAAAGGCAACTAGAAGACATCACAAAAGGCCAAGAACACCTTCTCTCAGAAGCTGTACTTGGATCTGGTTCAACAGGAAGA
chr05	22127288	A	22127188	22127388	AGCAGATAAAAACCATAATTATCATTAATAAAGCAAGGGTCAATGAGAGGGTGACCAATGCTAATACCCTCAACTGAACACTAGAGAGCCTTGACAAAAAAAAAAACAGAGACAATATGCTGCTGCTACGTGCTATATCTCCAAATAATACTTGCATGACAATAATAACTTGACTAATAGTACATCAACAAAAACGGTGTC
chr05	23005065	G	23004965	23005165	GCTCGTCGTCATCTAGGTCTGCGAGGCGACGAGAATCGGTCGCCGCCATGAGGCCTCGGAGTGGATCGGAATCGGGTGGAGGAGCAATCGAGGAGGACGAGAGATGAGTAGCTCGGTTAGGGTTTCACTGGTCCCGCGCCTCGTCTCTCTAGAATCTCGATGTTTACGGTCGGGAAGACGAAGGAGACCGGCTATTCTTTT
chr05	25048008	G	25047908	25048108	gagacggagggagtaTGTTTTTCTCCGCCGCTGCACACTGGGAAGTAATCATGTGGTAGATCATCGGTTGATCCTCCTCAAACCGTACATTCTAGAGAACGTCTCGAATATGTGAAAGCAAGAACTGTCATCCTCCTCTTTGATTGGTCACTCACGGCAGGTCAATTCAATCATCTTTCGTTCGGAATTCGGAATTGATCC
chr05	25741622	G	25741522	25741722	GACATGGTGAACAGCATAAGCTCTTCTGCAGGATCAAACAAATCAACCGATGCACAAACTCCAAATTGTGTATCTGCATGCAGGAACATGCATAGTGAAGGCTATCAGGGGCTTCCTCTTAATTCACATGGTGAATTTGTCAAGCTTCATCCTAGTGGCACAATCGATCCTAATGGGATGTTTAAGAGACAATTTCCGGTA
chr05	26896741	T	26896641	26896841	CCCCATCGATCTCAAGGCAAGTAGAGTTAGATACGATCTATATTATACGGTATAAACGGTTTATTTCCCCTTATCCCCTTATAATGAGAAATTGGAAGTGTTCATGAGTCATAAATCTTCACTCCTTGTTTGTCTACTTTGCATTTTCGCCTTCCTGATAACAGTCGAGTTGTGATGTGTTTGAATCAGTTCGTGCTTATG
chr05	27877402	G	27877302	27877502	AATAAAGGTCTGTTGATTAAATTATAGTAGTTTAGCAAGTTTAATCACCAATTAGGGTTAGATTCAATCGACTGGTTTGGGGCAAAGTGTTTACTTTATTGTAGATCTTGTTGCTTAAATTACATCGGCCGGAGAGGTTCCGACTTAACATGCTGTAGCATCGATGTAGTGTATTCCAAGCCTCTCTCTCTCTCTAATTAA
chr05	29203527	C	29203427	29203627	GCATTTGGATTTGGATTTGATTGTATCTTAATCCATCACGCCGTGCTGTTCGTCTAACTTCTGGATGAGATAATGGGAGACCCAATTTGGAAAAAAGTCTCTTTAATTAATGTGGCGTTTGAGATGGGAGGGACTTAACATAATTCTCTAGGCGAGGGACTATATATTTTTTTTCGTGAGAGGGACTAAAAAAtactccct
chr06	515128	A	515028	515228	ATTCGGTGAATTAAGATTGACTTTTTTCGTTTGCAGTTTGCTAGGACAAATTAAGAATATCTATAGGCTATTGGCGAGGTCGTCTAAGAATGAAGTGAACAAGTAATCTGCAGGTTGGTTGGTGATCGATCGATCGTACCCATACGTACGTGGTCCGTCATGCAGGTAAACTTTCCCATCCGTCCACCACATATGTATACA
chr06	2026585	C	2026485	2026685	AACTGGAACTTGATATGGATGCTCAGGTGATTTTATATGTGCTGTCCAAACACTTACCTCTGTAATATTTTGGTTATTTTGTTTATTCTAACCATGCTTCCTATGCGGGTGCAGAGTGAGACAACCCTCTGGAGGTTGAAATTCTTTGTGAGGGAAGCATTGGAACGACAGGCCAACGTCGCTTCTGGCAGGACTGATGAA
chr06	4521523	C	4521423	4521623	ATTCAATACAAATTATGTAATATCGAATTGATTATTCCCAGTAAAACTATTTTATAGATAGAGCTCGACTTATTTGAATGGATATCATTTCATGTGTATACAGATATCATGACACTCATCGCATGGTTCAAGTATTTAATATTTAATCCATAAATTAAATTACTTCTTTTGTCTGACTTTGATTTCTTGTGCGTAAATATT
chr06	5756473	C	5756373	5756573	CCCACTGTCACTGACGTTGTTAATATTGAGGCTATCTCGATCACCAGCAGGAATGATCTAATTAACGAGTGACATGATCGAACAGAAACATCATTAAGCGCAATAAGAACGATGCTCATGCATGCTGAGGTTGGAACTGGTACAAGCGCAAGGGCCGCGATGATTCCCCCTAGCTAATACTAGTATTAATAAACGATAGTG
chr06	7052557	T	7052457	7052657	TCTATTGAAATGTGATGAATGCGATCCTAGCGAATTGATCAAAGAAAATAAGTCCTTGGATCATCATAAATTCAACATTCCAGGGGACAACATGTCAGTTTATGAAGCTAGCAAAGACTCAGGGTCCATGCCAGAAATGCAGTCATCTGATACACTAGAGGTACACTCTGTAATTCCCTGCCAGGGAGATGCTGCAGATGG
chr06	9126589	T	9126489	9126689	ATGTCATAGCTGCGAGAACCAGTTGTCTGGTGGAACTGCACTTTAGCTCTGTTTGCTTTGTTCTTTTCACAAATCAACTGCAGCAACAAAGTTATGATCTTAAGGCACCTATGAGATCCACATGGTAAACTTGAAATGAAAATTATTGCCAAGAGCTTACCATTTTTTTTTCATCCTTCCAGTGTTCAACAAGTTGAAGCC
chr06	9514650	A	9514550	9514750	AATACCCCAATTAGATATTGGATAGAAATTTGTAGATGCTGATATAAACATTGTACTGCCGGGTTCTCCAATGCCTCCTAGTCCAACTACTACTATATATATATATACAATTTGCACATTGTGTACTTGCATTGTGTAGTATAATAGATAGAATGTACATATATGACATCTCACGCCATATACATATTTCAACGAACCTAC
chr06	10999637	T	10999537	10999737	TACCAAACTTTACATACATGTATATCTCACGTTCACCATTAGTTGGAAAGCTGAATTTAAGACTATGGGCATTTCACCAAACAAGAGTTTTGCTGGCATTTTAGAAGTTCAAATTAAGAAACACTTCAATTCGTCTCCTGCATATCTTACACATTAGCATATATGCTGAAATAGAGCACTGGAATGAAGACAAGATAGTTC
chr06	11025945	C	11025845	11026045	CGAAAAGGAGATAAGAAAAAAATGGCAGTACTTTTTGAGTGTTTGCTACACTTGAGCCCTCTAATCCGCTCGTTACCATGCCAACAACATCTAAGCTTGACTGCCGCCTTCTGGTAACCGAGAAGGCTGATCATTTCCTTGCCCCTGTTGCTGAGACCTTCTGACAAATGACAAAAACTTGTGGATTGCAGCACAGCCTAG
chr06	13514830	G	13514730	13514930	ACATCCCTCAATCTTAAGAAAATCCACAGTACAATTACAATATCAGGTTACCTATTAATAGTTCCTAATTGGCGGTGTATACCGACAAGTTGATATAGAGGCCAGTTTTCTATCTATTATCTGAAAATTAATAGTTGCGAATTGACATTCAATCTTTTCCAATGCAAGATAATGACCAACATTCAAACTCTAATTAGCAAA
chr06	14263717	t	14263617	14263817	agctagtaaagaagaaaaccaaatgaacatcgatctagaaagtgatatggaaagaacctaactctcatagcctcttaagatgatgtctcaccacattgtgtcaggaatcgactaacatgctcaactattaaaatattctcttgtcttgaaaactttgagaaattgggtgcctgtatcggtttggtaatggaaccctgtcaa
chr06	15490630	A	15490530	15490730	CTGTCCTGGAAGATGATTGCAGGGTTTGAAGGGGGTAGACTCAGAGTTGGTTTGGGCTTTTGCTGATAGATGATGTTCGATATGTAATTAATAGCTGCTAACCTAGTATGTGGTCTTAGACAGTTAGATTTCTGACTAGAAGATGTTGCTTTGGCAGGAAGAAGTGCTCTCTTTCAACTAGAATCGGATGGCGAAATAGTT
chr06	16445831	T	16445731	16445931	GGTCGAAGTGGAGCCACCCAAGACGGATAGCCTGGTAAGGTTCATGCAGAACTTCCTAGAGAAGGAAACAACAATGCCCAGGAACCGCTATTGGAGGAAGTCGGTAAAATCACATATACCGCACTGAGGTAACGAAACATCACTGTGCCACGACCGCACTGACCGTTGGATTCCAACGGCCGAAAGTGGGGCCggttgggc
chr06	17557758	C	17557658	17557858	TAAATACCTTGAGGTATCTGAAGGATCATAAAATTTCTCTGACTAAATATATAGGTCTTAAGTCTGAATTGCGCACACAACTGACGCTTCTGTTGTACATCAATTCCCAGAGCTGGAGAAGCACATCGAGGATGCCCACGTCCTGATCACCACCCCATTCCACCCAGCCTACATCACCGCAGAGAGGATCAAGAAGGCCAA
chr06	20660823	A	20660723	20660923	ACCCCAGTGATTAAATACTACACTTTCCTTTTCAATAATCAGTTCTTCCCTATTCACTTCATCTCTGCTTGGTTCACATCGTTGTTCACGGCATTGCTGCAGTATCCATCTTGTGATCGTTCTCTCGTGAACAACAAGCTGTTCCAAACAATCTGGGGAGCTCAGTTCACATTTACTGCTGCTGCTAATTGTCAGAACCAG
chr06	23019311	A	23019211	23019411	CCTTTAGGGGGATCTCGGTCTCGGGGTGTGTTAGGGGGCTGACTCATGTTTTCGGTCCCGGTGCGAGCATGTCGGCGACGCTGCTGCAAGGGATAGTATTATAGATGCTGTAGCGGTATGAAGAACCTTATAGGATCGCACTTGCGCTTAGTGCGGCCTTGAGATCTGTGATGGGGAATTGGTAGTTTAGGGGCTTCAGTA
chr06	23556727	C	23556627	23556827	GAAATCCTGAACAGTTTGGTCCGTGTATATATGCATGTGCATGTATTCTACACGTGTAGGGAGAGTCAACTGCAACTTGAGCTTTCGACTGTATGGCTTCCCTGAATACTCTGTcgtactcgtaaacgtaaacaaagtcgtttaggaaaaggtttaagtcaaactttggaaatataaattataaataactttcaagttgtt
chr06	24694757	A	24694657	24694857	GTGTACAGAAAGATGGTAGTAAGAACAACTTTGTGTAAGCACTTAAGTTCTGTTTGATGATGCTTGATTTCCTGACACAATCAGGGCAAAATTATGGATCAATATCACCGCTTGTCACTGTGTCACTGCTCCACTGTCTGACATGCTTCCTCGAGTTATTTTGtactacctccgtccgaaaataaatatagccatgggttt
chr06	25284453	A	25284353	25284553	aaagtatgtacctgaaaaacgaggtagggaagtcggtaactcaacacacgaacaAAAATGCAAGTGGGTTGTGCACATAGCATGTCCCTTTGTTTATGAAACAAACAATACGGGCAGTGGGACTAGGGGTATCAAGTGCTGCCACAGAGTTGTTTATGGAACAAACGGACAACTTTGCCCAGTGTTACCACAATGGGGGAG
chr06	26502375	C	26502275	26502475	GGTGTAACTTTATCAGCCGCGTAATTTAGAGAATATATGGCTTTTCTCCGTATAAAAAAAAGAAGTGTTTTACACTTCTGGTCTCTGCACAACGTGCACACAAACCAATGAGGAATATATAGCTAACACTACATCGATCCGTCGTCCACAGGCATTTGCTCTCGCCTAACAACGGCTCTAGCTAGACCTCTGAACAAGTGA
chr06	28691495	C	28691395	28691595	CATGTCTCAATCCAAAGATCTCTTTTTCTCTTCTTGATATATATTAGCTAGCTCTAGGTACAGCCTTATGGCCAACTGCTGAGAGTGACAGGTAAAATGGCCATATCTGAACTTCTGAAGGCATGAAGGTGAAGTGGGGAAAGGTGTGGACGATGATCTTGTCAAGCTTTGATGATGGCTTAAATCGGTTGGAGCAACGGC
chr06	29089100	A	29089000	29089200	TCTTGGATGTTTCACCCGGAAAATCTGGATTGGTGTCTGTCCAAAATTTGCAATCTGATCCTCGATAGCAGATTTCTGCAACAAGTCATCCATATTTTCTAGATCAACTGCGCCTTCATATGTAACGTAGTAAAATATGTTTGCTGCCTGCCCAAAAAATATTTATGTGTTAAAGTATATTCAGTAATATTCCATTGTATT
chr06	31670512	C	31670412	31670612	TCCTGCCCAGTAGCTATATGAATAAACAATTCATTATAGTTACAAAGTGAAATTAAGTTATTTAATCACAAAATGAAACCAAGGAGATGCTGGCAAGCTACTCCCTCCACCAATGGCTGACGCAGAATTTTAAGACAAGTATTGTATTCACTCATCAACAATTAGAAATAAATTTATCAGAAGAAAACAAGATTATGTCAA
chr07	653835	A	653735	653935	TGGCTTAAAAGTTTGGTTAGAGAATAACTGTGACGAGTTACTACATCTTGTAAGAGTTGATTTAAATCCTGAATAAAGATCTCCCCTTTTACCCGAAAAAAAAATATCAAGGTGCTAGCCATCTTAGATATATTAATTATATATTTTTATTTTTTTCTGTTTGCATCAATTGGTGTAGGTATGGAAGGCGCAAAAATTAAT
chr07	2028144	C	2028044	2028244	TCTATATATTGTCTAGGGAAGTAGGTTAATGGGTTGCACATTTGCGATTATTAGCTTGTAATGATACTATCTGATCATGCAAGGACATCCTTGAAAAAATCTAAACTGTCAACGACGGTGCGCCATAAAAAAATATTTCAAATGTTGGTCGCCTACAGTCAGTTAGTACTTCCTAGTTCACTTGTTGCTTGCTAGCTTTAA
chr07	2683214	g	2683114	2683314	CGTGCACCTTCTAGATGCTAAACTTTTTTTTTTTGCACCACTACTCCTACCGACACCTCATGTACGTATGTGTACAAATTAAGtactcccttcgtatttagggtaggacgcaattgactttttaaccaacgtttaaccattcatcttatttaaaatttttgtgtaaatataaaaatatttatgttatgcttaaagaacatt
chr07	3751970	G	3751870	3752070	GGATTTTCTTCTTCCTCTCCCTCTTTTCCCCCTCTCCTCCCTCACATGTCCATGGAGTCCGCGCCCCCACGCTGGCTCCGCCACTGTATATAATCATGTAGTTTAACAAACTACCCTTCAAATTCTGATATAAACTAGAGAAGGATATTCAGTTATGTTTGGATTTCATTGAACCTATAACAATGTAGCATGACATACATT
chr07	4017720	C	4017620	4017820	GGGTTGGTTCATCTTGTCGTCAACGGCTTCTCGTGTCTTCTTTGCAGAGAAAAGAGAGAGAGAGAGAGAGCCTTGAAAGGTCAATGCTCCCGTAAGTTCACCTGCCTCATCACGTACGGTCGTACGTACGAACAAATTAAGTTCCAGTACTACAGTATATACGAGTATATATACGAGTAGCAAAATGTCCATACGTTGCAC
chr07	4129883	t	4129783	4129983	ttcagatttttggaaggtgagagtatttgttagtctatatttaatacttcatgtagatattcgaatgcttgatgtgatggggtgtaagattttagggtagtatcttaaacaCCCCTCAAAAGTATAAAGAATATGAAAGTCACCTCGAGGTCAGCTTGTGCGCAGGAGCGCGAGGACGTCGGGGTCGCCGCGGCTTTGaga
chr07	6003486	G	6003386	6003586	AATATCATAACATCATACAACAGTAAGGTGATTTTTGTAAATTTCAGTGGACTTGCATTGTAAAAAAAAGTGATTCACAAGGTGTTTGAGAAAAGCTGTGGGGTTAGCTGATCCCACGGTATTGTACATGGCTCTATCATTGACGGTGACGACTGCATATGTTAAGGGGAAGGGGCAAAAAGCTAGCCCAATGTATAACAT
chr07	8686544	C	8686444	8686644	GAACATTTAGGACATTATTCCCACAGTATTTTTTTATGTAAATTACTGCCACGTGAATTTCACTAAAGGAAAACTATTTACATAGAGGATTGCTATGGCACGGGATTCCGTTCCAACGGGATACTTTATGAATCTTCCACCTCTCGTCTTCCCAATGGTCAAGCTCCAATGTTGAAGCAACAGCAACCCCTAGCCTCTTGC
chr07	9029475	A	9029375	9029575	TTTTGGGGCGGCAGCGCCGGATTTCGGTTTGAATTTGTTTTTTCTTAGGGAGTATGGGCTTGATTGTTTGATACCAACTTATCGTCCTACTAAAATTTTGATAACTTCAATAGTAGCAAATGCCAAGTTGTTGTATTTCTAACAAGTTGTTGCATTTATGCGATCACTTATAAAATTCTTGTACTAAATTGCACGTACATG
chr07	9183364	t	9183264	9183464	cttttttgttacggctacaatataatgaatttcaatacgagactttgtagatatgtgtagtactattaggagtaaatgtcaatttttttataaaattttttatgacattgttagttggtgtgcacgaagtgtgcacggtaagctcgtgtgcataggatatattgccCCGATAGATAGCCTTAATTACAAGTTGTTATAATT
chr07	9186821	C	9186721	9186921	GCGGCGGCAGCAACGGGCGACGGCGGCGGGTAGTCATCGAACAGCCAGGCCACGCTCTCGCCGTCGTCGCCGCCGCCGTCGTTGCCGAAGAACTGGAACTCGTGCACCGGTGGCGCCGGGGCGCCGATCCCCTGGCACGCACTCGGCGGGAAGACGAAGGGGAATCCATCATCATCGTGGCGATGGCGGGAGCAACAGCCG
chr07	9188199	C	9188099	9188299	agatgcactctaagctaaagctatttctcacaatgtatgtgTTCCACTTTATAAATGTAATCATTGCCATAAGGTTACCTTTCGATATACCGTGGTTGCTCTCATACATATGACTGATAATAGATTGAGGGTGTGGCGCGGTCTTCGGCGCACGAAGGCTAGCCGGCGGGGACGGGGTGCAGTGGTCCCACACATCGGCAG
chr07	9643247	t	9643147	9643347	ATATCTTCTCAACAGATTGATGGATTATTTTCACTGACATCATCACCAGCACCTTTACTTCATTGGCCCTGACGTCTCCGTCGTTGCTAAGGGGTGACTatgtcttcgcctccagttgcttctgtcgttgccgacttgttatttcaccttcacggttgacctactacgcaaacgccgatgagcgtctTCATCATAACTGTT
chr07	11015837	G	11015737	11015937	ATAACCAATGGTCCATCTATCCATTTCATAAAAAATTCTGCCATATCGATCGGGGCAACATGAAGACGACCGCCCACCTAACGATTTCCACATGCCGTCCGCCGCCCACCTTTGTAGATCTATTTACCTAAGATGTATGGTTACGCACCACAAACGAGAATGTCGTGCATCCTCCTCCAATTCTGGAAGGATCATCGGGCT
chr07	12046278	A	12046178	12046378	CTTTTGGTGCCTCCATTACAACTGCTGGAAATGGTGTTTCCTTATTCTCATTCTCATCACGCATCTCGCTGGGATGCGTCAGCTGCGCCGTGGTTTGCCGAGCTAACTCCGGATGGCTATCTTTCAAGGACCCACTTGTTTTCGCTGACCCTGTCAATCTGCATAGAAATCGGCATATCAGATATGCAGAAAACCTTGGTT
chr07	13016744	G	13016644	13016844	TCAATTTCAAAGAGAATCCGGAATCACTCCTGAGAAGAGCCAGACCCAGAGTCATCTCTCCTCAAGTGACTTTATCAGCAACCAGATCAGTCATACCAGCGTCATCAACACTTAACGATATGGCTAAGAAGACCCTTCACAAGTTCACTGCTCCCTCTGCTGACAACATGCCCGTTGGACTCCCGAAGTCAGCATGGGAGA
chr07	15189077	G	15188977	15189177	CTTCTTATTTTTAGTTTCTAAAAACTAATGGTAGATAAAAGAAAATTACGTGCATCAAAATGACAGCCTACAATTGAATATACGGTAACAGAACTGATGTGAAGTGTAGACAGGAACTAACCATGTATCCATGTAATAAGGTTTGAGTTGACAAAAGTCCCTTTCAAATGCATCTTGGTCTTCAATTTTCACACTCAGAAC
chr07	18451370	G	18451270	18451470	GTGTGGACTCACCAAGATCGAAGAACTCGTCTCCCTGTGCGGAGGCGAGAGGCTCAGCAGAGGCACGGGTTTAGTCGACACGTACGTAAAAATTTAAGCTGGTGATCCAAAGCAACTCGATACGTTCTCGCACTGTAAAGGCCCTAATAGTCTCTGGACAATTAGCTTTATATAATTTGGAACATTGTGTTCAATTTTTCT
chr07	18897313	A	18897213	18897413	CTCCGGTGCGGCGTCACCGAGAACCCCGGGTGGGGTGAGTTCGTTCTTCTCCACTTCTCCGTGGCATTGCGAAGTGATGGCTATGATATCATGGTGATTTAACAGTAGCATTTCACAGTGACTGTCTAAGCTTAGCTGATTTTGAAAGTTGACAGTGATGTTCTAGGAGTATAATTACTAATAATCGTAGTGATAGTGATG
chr07	19528289	T	19528189	19528389	CACCGTGCCATCTCAACACAACTCGGCCATCTCAGCCACTCTACCACGGTGGTCTTAGCCCTAAACCACACCTTGGTGCCAATCGGCATCCCGAACCACATAGGCTCGTTCCCAACCACGAAGGATGGTCGTCTGCCACAAAGGCAAACTCTGGTaacgattcccatcccaagaatcaatttaataagtttaaaacaaaca
chr07	19749012	C	19748912	19749112	AACCGTGCAAGCAGCGGCCAGCGATCACTCGAGAGCTCTCACGGTCACGGGCTCACGGCATGCTGGCGTTCATCGTATCGGCGATCCAACAGGCAACAGACTGACACGAACTAATCTGAAAATGCAATTTAATATTgggcctatttggcacagcttcaactctagctccacctcttctggagctagaactcagctaaacag
chr07	20550619	G	20550519	20550719	ATTAAAAATATGTAGAATTAAATAGGGAGGGTTATGATTGGATAAGATAGATAGAAAAATTAAATGGTGGAGGATTGTGATTGGTTGATAAAAAAATATTGGTAAAAGTTGTTATATTTTAGGACATTCTAGAGGCTGAAAGTTGTTATATTTTGAGACGGAGAGAataattgatttgtaactacaacataatttatatgc
chr07	21075582	T	21075482	21075682	CAGTTTATAAGGTGAAGACGCTTGAGTACGTGATGTTAACTTCGATCTGGATTTTTTTGCGTGAAAGGCAGGACGAAAACACCAGAGAGTTAATAGTTTATGTGTGGTCCAACTGAATGAGATGACCCAATAACCTTAGCTTTTTCGAGCCCTGGGCGCCAGAATACATTCCATTGAGTTTTTGGACTCTATTTTTTAGAT
chr07	22569511	T	22569411	22569611	CAAGGGATCTAGTGAACTTAATGTAATGCACGTGCGGGCTATACTGTATGGGCTGGAAAGGAAGTGTGGTGTACTTGCAGCCCGTCTTATATGGCCCATATCCAATAATTTTCTGTCTTCGCTTAATCGCTTCCCGCCTCCACAACGACGGCCACTGGCGTCTCAGTTAGAAATACCTTGGTAGTCTGCTACCACAAGCTA
chr07	23000142	A	23000042	23000242	AAACCATTGGCCACTGTGCCAAGTTGGCCCATGAACACCAACTGTATATATAAACATGCACAGGTAAGTTCACTGATAACTTCTCCATCTACACATCACAAGTTCACAGCAATTGCCAAGTACTCTCTGAGCTCTCAAGCTACAAGTTCTTAATTACATAGTAGCTTCTTCAGTGATCGTGAGGTTAACAACAAGAACAAG
chr07	24073668	c	24073568	24073768	TCAACATATCCTATGTAAGGCTTAATACCCACCCTAAAACAGAGAAAAATAAACTAGGATCTGCCCAAACATATCCAAATGAGTCCAaatgagacgcttgcagcaacttcatcaatctcaaaatataacagtccaatattctagaggtgctcatagggatagagTATATGTTTATAGGATAAACACACGGGCGTTTGGGAA
chr07	25471978	g	25471878	25472078	gtgtccatagcaattaaataagttgccacctaggaaaaaaaatgacgtggcaagtgaataaatgaggaaagataaggaaactatatctagcatgagacatggtttctacataacatccaaggcatcatgtgagataagtagcattaaattgaagtatggaatagtggtgtttgcattggaagagtagtgtctagtactagt
chr07	27616346	A	27616246	27616446	TCAGTTGTAGTAAGGTTGTGCTTATTATCTTAATTTTGCCTAGTTCTCTTAGATTTTAAAAGGGCTTAACTTTGTAGTGGTCTAAAACCTGATGGCTGACATCAGTACATCACAGTTCCACTCAGTTTTGTTATTGGCATTCTATCGTACAGTTAACATGGCTATTTTTTGTTGTGCTTCCTTTACAGACTGATAGACTAT
chr07	30041286	G	30041186	30041386	GCAGTTGTCCCAATAGAGAAACCAGTGCAAGTTCAAGTGATCAAGTTTCTTCGTTCTTGTAGAAGGTGACACTGTTCAATTGGAAAGCCTGCCTCTTTCGGCTCTGTGGAGAAATTATTTGAAGGATCTGGGATATGCTGCAAGAAAAGGTATGCTCTAGTTACTGTCGCTATGATCGATCATGTACTTGCTGAGTTAATT
chr08	1043623	C	1043523	1043723	ACAGAAGAGCCAATACCATATTACCATGGTCAGGAAGCTGTGGGTGCCGAGCTGGATGATATCTTGATGCAGCAGATGTCCTCTGGGATGTAATGTACTACTGTGCCTGAACTCTGAACACCTCTGAAGATTATAGCCTTTTCAGTCTGAAATCTGAACATTTTGGCCTTCAAATTCAGAGATTTGGCTCCATTGATCCTC
chr08	1513642	c	1513542	1513742	ATGCATTCTACTCCTTGGCATTAGCCATCATTACTTTACCTCCTTCTCCGAACAACATATTTTTCAAACTTTAAACCAAATTTTCTCCTAAattatctaactacattgttgtattaattgcaattgaatctttacaacaatatcccttatcattatattatttataataataaaaatacataaaACATTAAGTTATAAAAA
chr08	3531417	T	3531317	3531517	TATGGAGTATAGGTACTATATCTGTCCTAAAATATAATAACCTAACTTATACGAATCTAGACAGATAATCTATTCAGATTCCAGATTCGTGATATTAGGATGAGTCAAAATTTATGTTTTGAGATGAATGAAGTATATATATATATATATAGAAGGATCTACTAGTAGTAGTAGAGAGGAATTGAAGTTACACAAAGATAT
chr08	4005049	T	4004949	4005149	TTCAAATTTGCAAGATAAACACCAAATATTTCATCCTTGCATGGTTGAATAAAACATCATGGTTCAATTGATACCAAATATTAGATCAGTGCTTTCTTGCTTATTTTATTTTCCGGAGTTGACTAATCTTCCTTGTAGCTTTACACTAATTTTCTAAAAAAGGTAATCTGCCCTTTTTCTTTGTTTTTTTTTATTTTCAGT
chr08	4509143	G	4509043	4509243	AACAAAAACACCATTTTTGTCTTCAATTGCGAGGTCACATGTTTTGCCGGTGGATCTCATCGGCAGGAGACGAGACAACGACGGAGAAGCGGGATCCGACGTGGCGGCATCCACGTCATCCCGAGGGTGACAGGCCACCGTGAAATAACAGCAGCTAAGCACTCAAGCTTTTCTTCTCATGGCGACACGTCATCATATTTT
chr08	5540159	T	5540059	5540259	AAGTTAAATAGTAAATTAGAAATTAAATCTAATCTATGACTTGATTAGATATAAAAAGGAAACCAACGGCATGGAACCATGCAGTATATGTGTCCCTACATAGAAACAGAAGTTGGGCTCCCGATAGTGCGCAACACTTATGATACCGGCGCGTATGCATGAGTTAGTAGCCCCCGAGAATGAGAAGAGAGAGGTGAGAGG
chr08	6198949	C	6198849	6199049	TGTGCTAATTTGAAGGGTATTCCATTGATGATGTTTCGTCTACCAACAAATCTTTCACGGATATATTTATGTGTCTGCCATGATTATGTACGGACTATTACATAGTTCTAGTCAAATTGATGGTCGTAATAATAAGAATTCTAGTTGATTAACTGCCTATGCAACAGTTTTTCTACAGTTAATCATGCATTCGAATGTCAT
chr08	8235973	T	8235873	8236073	TGATGTTTTGATCTTGCAGAAAGTGTGTATGGTCTTGCTTTTCTCGGGGGCTCCATTTTTTTTTTCTTAAAGTGTGCTTTGTGTGTTGTCAAGCTGCATTTCGTTTTAGTGAGTTTCATGGATTTCTCTTGATGGTCTGTAAAAATTACTGGATTTGTTTTCAATGGCCCTTTGGCCCTCTAAAAGAGAAACCACTGACCG
chr08	8493107	G	8493007	8493207	CAATGATGTCCAGTTCATACACCTTCCAAGAATCTAAGGTAATAGTATGTCAGACCTAGATCTTGTTTAGACTTGAACACCTGGTTTCCTCTTCACATGAGTCTATATAAAGTCTACAACATTTCAACACAGCACACTCCACAGTCTGCCTACTCACTTAGGCACTTCGCATTAGCAAAAGCCATGGGGCAACCTAGGGCT
chr08	9237171	G	9237071	9237271	ACTTTCAATCAAAAAGCAAGAAGTTTATAGACTTTAAGTACACAAATGATCTAAACCACAACTGTGTAGCCTAGCACAATACACCAGATGTATATAATAAGTAGTGGATTGGCACATGCTGAATATATATACGTATGCAAGGGCTACTCGGTGAATGCCCACGCGTGAGAGGAGAATTTGTTATCCCGCACAATCCTTCTT
chr08	10562211	T	10562111	10562311	GGAGTAGATGCGAATGTTGTTGGAGAAACATCTAGTTTTTCCTTTCCTTGGGCAGAGTGCCTCCTGTACTGAATGATTGCGAAGTTGCTTGAGATGAACATTCCCACAGAAGCATGGTGAGAAATGGAGAGTATTGTTTAAGGGTTAATTTGATTTATGCCAATACAAATATGGCATATTAGAAAAATACCGTTGCAATTC
chr08	12951309	T	12951209	12951409	TCAACCACCAATTCATAAAATCCACTTTACATAACAGACATAAAAACAAAAATATATGTACAAATCAGCTAGTGTTTTCAACCTTCACATCACATAGGCATATAAGAAAACAAAGGAAGTAACAAATTGAGAAAAAAACCATTTACTTCCTCATTTTGAAAAACTGGTGAAAGAAGCCCCAATGCATCAGCCACATCAATA
chr08	14500564	G	14500464	14500664	ATACAGCAGGATATTTCTATCCACTACGTAAAAAAAATATTGAGTAACATATTGATGGCCTGATTCGGACGTGGTCTCCTCAAATGCTTTAATTTTACGTGATGGATAGTATCAGTGTGCAATGGAGTTATTGGTGCAGATGAAGTCCTAAAGGCTGGTGATTTGTGTCGACTAATCCACAGGTTCATGATCAAAGCCTAT
chr08	15518793	C	15518693	15518893	CAGGTATGTACCTCTATGACTTTGCATGGCGCCACACCAGCAGTTTGTAACTCAAGGAATCTGAAATGCAAATGGTGAATGAGTTACGAATATCAAATTACGATTATCATTTTGTCAACAACTACCATTAGGAACAAATAACCAAATCTAGCAAAATCTGTTTTAACTAATATTGTAAATAAAATAGATTGGAAAATTTAG
chr08	15774087	C	15773987	15774187	TTGGAAAATTGATACAGCGCACCATCTTATTTATGCACTCTACCTAGCGACCATATTTACTCAAGTTTTATTCAATATAATGCCATACATTCAAATAATACGAGGTTGATAAAAGTATTATGGAGTTGCTTTGCTGCCACTTTAAGCACAACCAATAAACTTATCAATCTGTTTGCCTTCTTGTCCAAAAATTGGCATTAA
chr08	16353188	C	16353088	16353288	GGGGATTTTAAGTAGAAGGAATAGGGGAGTAAGGAATCCGAGGGAGTCCGAGCCGAATAGCCGAAGAGGGTTTTGATTCGATCGCAAGGTTCCAAGTGTTCTGGGAAAGAATTGGTATTGCGAGAAGCGAAAAGTTTTTCGTACTTCGATCAGCTTAACATCGAAGTGCTTAACAATACAACAGAGAAAAGGGAGGACGAG
chr08	17628099	G	17627999	17628199	tgctcaaacttagctagaaaaaaaaataaaatgacttataatattaaTGGATGGAGCAGAATTCAGTGAGATATGATGTGCCACTAGTTTCTTTCTCTTTGAGGTGCGTATTTGTTGGTGTGCGAGTGTCATGTTGGATATGTCTTTGTCATGTAATAAAAAAATTACTGCACAAATTTGGAACCAAGATTAAAAAAAAAT
chr08	18311415	T	18311315	18311515	CAAAAAAATGGCCTACTCTACTCGTTAAAAAGAGGAGTTGGTTGCAGCGCTTTGTACTAATTTTATGTAGATGGTGCAACGGATAAGCACTAACTAGTGATCATATGAAAGATGAAGAGCAGCTTACCACTGATTTGGCATTTGAACTGGCTTCCTTCGCTTTACCTGCGACGAAAGAAATTGGATTAAGGTCATACTTTC
chr08	19514852	A	19514752	19514952	TCATAAAAGAATGAGAAAAGTGATTGAAATAAGACACCTCCCCAGCAAAAATATGCCAGAAGCAGGAGGCTCTCTCTCCCCATCCATCCGGGATATAGAGATTGTTTGATTCGTATATCAACACTGTCTACTGTTATCATGGTATctatttggttcatagatcaacattgtccaaggttatcataattttctaacaagctt
chr08	20796425	a	20796325	20796525	GGCCACGTATGCATGTAATGGGATCGACCGATAGAATCTGTCAGATCAGGTTATGTTCgagcctgtttagatcccatgtcacgttttttcatcttatcacatcgaatatttggacacatgtataaaatattaaatataaataaaactaattatacagattatgtgtaaattacgagacgaatcttttaagactaattgctc
chr08	21509867	C	21509767	21509967	TCATCAGATGATGAGCTTTAACAAATGCTTCACTTGAGTTTGGTCATGTGGTCTGATATCTTCTTCAATTTACATTTAACATGGCATTCCTCTATCGCAACTGCTTGACTGAACTTGCTATCAATCCTATAGTTTTTCTTTACTAAATATTGATGATGACATTTTTTATTCCTTATACTAGATATTTGATGGTCTGTCATA
chr08	21551552	a	21551452	21551652	atcatgggccctatattgcaccggttttgacagttgaggggcgagttgtatatggttttgtggttgaaggacaaaatcgaattcattcacgagttaagggacctcagatgaacttatcccGCCTGACAATTTACATGAGGCAGTCCAATGATTCAAACCAGGCCAGCCAGCCCAACTAGACGGCTCTAAATCAGACGGCCC
chr08	22112160	T	22112060	22112260	CTGTACTTAGATGTGTGCGGAACTAAAGAAAATGTTCAGGCATTTCTGTACTTGCAAAAATATTGCTCTTCTCTGTATTTGTTCTAATTCCATGTTTGTCTCAGGACAAATATAGTTGAGGCTCATATACAGCTACACTCCCTTCTGAAGTCAGAATACACAGCTGACGAAATCCAATCAATTGGTATGTTGCCTATACCC
chr08	23707293	a	23707193	23707393	AATCGTTTATGTATGTATGACATATGAATCCAATGGTATAtgctccctccgccaaaaaaaaaatgaatctaggactgtatgagatatattctagtacaataaatctgggcatatgcatgtctagattcatattactaggatatatcaaatccagtaatgtgttggttttttatggaacagaggaagtaGTTAATTATCATG
chr08	24676729	c	24676629	24676829	TCCATTGATTTGGGCACAGTGAATTTTCTGGTGGCGACTGTGGATGGGCAGCCAAAAAAGGAGTCAAAACAGGGTTGCTACTGTCCGAAGactcctaaccctacatctaggatgttgtctatgtcattaactatattattatttactagaacttttaacttatgtgacattatattaattaagagagagtggagagaagaa
chr08	25513935	a	25513835	25514035	GATAGGTATCATATTTCTTAAACTGTAACACctattagtgcttggcgtacttagagcaagtttaatagtatagacaactactagctccaaaacatttataatcaatttagtcaattcttaccataattacctataagagcagttacaataccaGACtactctctccgtcctattttaagtgcagccatgattttccgtgca
chr08	26876199	C	26876099	26876299	AACTAACATATTACATGATGAATACAATGTCATGACCCCTAAAAGAAGTTCATGCAGAAGATATCAAATCTGGGGTCCTGAATCCACCCCTACTTCTCCCCGGGTTGGTTATGGTCGGAGTTTGAGTCTCCCAGTACGACGGTCACTAGTTGGCTCCTTTGAGGAGTCCCTTCTATCTGGCCGGCTTTCTTATGGAAAAGA
chr08	27556823	a	27556723	27556923	GACAAAATGGCCGCGACGCATGCAGCAGTAGtactccctccgttcccaaaatgatcatcatatagtttttttagattattcctaaataatcatcatatttatatttattcattaagtctattcgttatttgtgcatttgagtaaatagacattgatgcatgcattcatgcatacaagtatttataacccacatgcaatatc
chr08	27816975	G	27816875	27817075	AGAATAATGCCGATGCCTGAAGACCGAGTGTCGCCCCGGGGACAGCAATTAGCATACCCTGAAGCTGTCCTTCTTGTGGACCCAATAAATCCTGACCTAAGAGGAGAGGTAAGCTGAAAAAATAAGGATTTTTTTTAGAGAACGATGGCAGGAGATCTGCCGGAATTTTAATTATCAATTAAACACTATTCCTGGTAAATT
chr09	1689083	G	1688983	1689183	GAGACTCGTCACGGCCCGGCTTTTCAGTCATTCTCACATTGCGGCACCCGCTCCAAGGACTATGAGCCCCCATTGCATCTCGATACACCAACCCTACCTCGAGCCAGAAGTGAGGGGAGTCATGGCACTCCCGAGAGCAGGGAATATTTAACATATATATATACTTATAGGGTGCATTTTAGGTTTTTACCAGTATTTTCC
chr09	3528636	G	3528536	3528736	CTTGGATCACAATGGATGGTGGACAGAACCGTCATTGTTTAATATGAACACTGGTATTAAAAACTTGATCAGTCTATGCTAGGTCTTAGGCTTGTGAAAAGAATTACAAAACTtgctttgcgcaaaagaaccatagccatcctttgaattcctctgtcatgtgcatcattgctgtgatggcttgctgagtacggttggtac
chr09	4025480	A	4025380	4025580	GGAACCTAATTAGCCATTTTTAACATATAGTTATCGTAAATAGCATTAGAGAATTTAATAGATTGTAGCAAAACATCAGATGGCGATTTTCTTGAGGACTAATGTTTTCAGGCCTATATTCATCTGAAAACCAAATCTCTTCGATTTTGAGAACATCCATCCTGCTAGTCATGTGAGCAAATACAACAGGAACTAAAAAAT
chr09	6536308	A	6536208	6536408	CGATGAACTGTGGCATGTTAGGCCTAATATGTTGTATCAAGTAGCTACTACAAAAAGAAACCAGGCACCATTGGAAGAGGGATCGATGAATTGATGGACTAGCCACGGCTCTTCTTCCTCCTCCATCTTCTCCCCAACCTAATGCTTCAATTGTAAAATCAAAGTGTTTTTGATTGTTATTCTGTGATGAACAATTGGTAT
chr09	8639155	g	8639055	8639255	ggataacaaaacatggcaccttgttcctcctcagaaaggcaaaaatattattgattgcaaatgggtgtataaaattaaaagaaaggctgatgggagtttagatagatataaagctagactagtggctaaaggctttaagcagagatatggtatagactatgaggacacctttagtccggttgttaaagccgctactattag
chr09	9269127	C	9269027	9269227	ATGGAGGTCACAACGCCAGTGCACCATCGCCGCCCTCCAAAACTTAGACAAGGCTTTTGCCCATAGGATCCCACTAGGAAGGGAGACGAGGACACCTCAACGATGCCCCAAGGAGGGAATGCGATGCCCAAAGGCATCGCCATAGCTGGCCTAGGAACCTAGGCTAGGCTTTCACCTGCTGCATGCCTCCCTTCCCAAACA
chr09	10008700	G	10008600	10008800	CTTTAGATGCCTAATAATAATGACTTTAAGTAGACTTCTTTTCAGTTTTGTGCTAGGACGGTGGCTTCCTATTCGTCTCTTTCTTTGCCTTGGAATTAGAGTTAGATGGAAGTGCTATGCAATTTTCCAGTTCTGTGTATTTATggcttctttgaatcgtaggattggaaaaatagaggaatagaaaaaacacatgattct
chr09	11136771	A	11136671	11136871	CTGTAATAAGGTTATAAATAGCCCTTCTAGGCCATGTAATAGGGGGATCCCCAAATAATTTTTTACTAAGCAATACAATTGCCTTACTTTTCCAACAACTATTGAGAGAACCACGCCTTTCGGTGTGACGCATACCTTTTCGCCATAGTACGTAGTGGGGGCCGGCATGTTCCGACATAACAAAAGCACGAGAGTGACTAT
chr09	11500168	G	11500068	11500268	ACAAACTGTGTGCAAATTATGATGGTGGCTAGTTTTATGAGATTTCTGTGGAAATAGAAAGTCAGCCAATGCAACTGATCGACATAAATTTTAGTAGAGTGGTTATCGGGTCGTCCCTTTCGTTTCAGATATCAAGCGACATCTCGTTCTTTATAAAATAATAAAGAAAAGCGACATATATGTATATAGAGAATTCTAGGG
chr09	13593767	T	13593667	13593867	TTGTAGTGTTAGTGAATTAGAAGATAGTTGCTGTATATATGAGATCTGCGAGGGTGAAATATTTTATAAAAAATGGAATGCATGTTGACATTGACAATCATCACATTTTAAACTCTTTTGACATCGTAGTGTAAGTTAGAGTTGACGTTATTTCATTTCCTGTTGTAACGCACGGGCACccaactgttatagaaaaaagta
chr09	14194650	A	14194550	14194750	TAGCCCCAATCGTGTGCTCGTTCTTACCCCTTTCCCTACCCCAAAACCTAGGGAGGATCAAGTGGCGACGGTGGCAGATAGACTTTGGCAACAAGCGGCTACAGTTTGGTGAGCATGCGAGGTGCTACTGTGGTGTGGCATGCATGAATTTGTTATTTTTACATATCACAATAATTTACATGTGTATAGTGTAAAACACAT
chr09	16379118	C	16379018	16379218	agagtgatacattacttagtggtatatattattAGCTACTACTCTATCACAAAGATACAAGAACCTATAGTATTGGGTGGAACATATTCTAATTATAAATCTGAATAGAGACACATCGTAATACTATAATTATGAATAGGGACCCATCATGTACTATTCTTATATTTTTTGTCCAAGTTTATAGTAATAAGATGTAATGTC
chr09	16704873	G	16704773	16704973	AACACATGTTATCCCGTGTTTCTTTGACTAGATGGTATGCACATGGTGAATAACTTTGAAGAATCTTTTGGAGACTTGGATGACTGCAATGAAGAATACAGCAAAGTTAATTTAGTTGCTCTAAGAATATCTCAGTCCGTTGTCTCACTTGCTTCGTTTAAGGGTAATAATTCACTGTCTCAGCATAGACACCAATCAAGA
chr09	17685707	C	17685607	17685807	aatttagtccctctcacagggacttatgtttTTGAAACTTTAGTCTCTCCAACCAAACACCACTGAAGTGACTAAAGTGGAGCTAAACTTTAATCACTCTCACAAAAACATAAGTCTCGCACCCTGATTTATAATTAGCTTATGTGTGACCAATTATTATGTCTCGAGCCTGTTGCTTCTGCAGAGAGAAGAATAAAGGAA
chr09	18448550	G	18448450	18448650	atttggcaacaaactaaacatagccaaaattttaacaacttaactgaaaaaaatggtatggttgaaaattgcattaaagtgaatatgcccttTCTCTTCCGGTATCAACCGGGGAGTCGTATGCAACGTGGTAGATCTGGGCGAACCGGCGAAACAATGAGCATGGCTAATGATTTCGCCGGCAGTCGGCTGTAACGTGCG
chr09	18682942	G	18682842	18683042	AGGTAAAATTAAATAGGATAAAATTGTAATTGGTTGAGAAGTGAAGATAGGTGAGAAAATTGAATGATGGAGGATTGCGATTGGTTAAGAAGAGAATGTTGGTGAAAAAGTTGTTATATTTTGGGACAGACCTTTATGTCTAGAAGTTGTTATATATTTGGAGAGAGAGAGAGAGTAGAATATATCCCATGTCTGCTCAGA
chr09	19684269	G	19684169	19684369	ATAGATGAGGAATTTGCTGCTGATATTCACCGTAGGCTGCAACATCGGACCAAAAACCAACGGAGGGCAGAGTGTTACAACATTCAGTCCATTGTTCTTCGCATATTCGAAAGCCGCTTATTCAGCAATagggcctattcactttgacgtcattttcaaccttaccaaactttagtaaagttatcaaaaaaaaagtggcta
chr09	20285922	C	20285822	20286022	AATTTTATCTTTTGGGTATCTTGTATCTTAGTTGTGGGGATGCTAAACGTATTTTTTTTAGTTTCAAATCTTAGTGCTAACAGTATCTCTTTTACCCCCCCAAAAAAAAGCCTTCTCTGTTAGCTTGCAGGTTCCAATTTCCTTAAAAGAAGCATAATTACCCACAACTCTTCTGATGCAAAGTTGCAAGCGTTGATATTG
chr09	21619808	C	21619708	21619908	GAGAAGGAGGGCAAGACGTTGTTGCCATATTGCCAGGGGCTTGAGGTTGGTTTCCATCTCGTAGTTATTAATTACAGTATGGAATCTCAATTCTTTTCGTCGATGTTGATATGAGGTTGGTTTCCATCTCGTAGCTGCAGTATGAAATCCTTAGTTCTCTCCATTGATGTTGATTGGTAATCACAAACATATTAATGCCAA
chr09	22460796	T	22460696	22460896	GAGCGGGATTACGGTTGCTGTAGCCTATGGTTTGCCTTGGTGCTTGCGGCACTATTGGCTAGCAGTTGATTAGCCTCTATGTTTTTCCTGTGGCTATACTTTACGAACCCAAGTATTTAAAAATTAACACATGCCTGCCCGCAGCTATGAGTAATCACATTTTTATAATATCAAATTAAGGGGTGATTCTTATCCTCGAAT
chr09	23234733	T	23234633	23234833	CTGAATCAGCATTTGATCAGCGGAAAGAATGTTTCACTGAAGAAGACTCTGAGAATGCTCGACAGAAACAAAGTTTTAATCACACTGATATGGTGTTTTCTGGTCTTGGAAATAGCAATAGAGCCTACATGCCAGACCATCTAAACAAAAATCCTGATATAAGATCTGAAAGCAACACAATAGCTGTTGGTCAGCATGCAC
chr10	1092951	G	1092851	1093051	aacttaattttgaagttaattttaacatattttcaacacaattttttatattaacttttaagttgctaagTGTTGAATAGTCCCACATTGGTTGTGGAAGGGCAAGGGACCTACTTCTTCATTCCCAAATTGATCATCATGTAATAGAATCCAAAATTTCTCAAATTGATCGTCATATAACTGCATAGACACCGAATTCAT
chr10	1757003	G	1756903	1757103	GGTTATAGAATCTAGTCTACTCCATAAGTCCCAAAAAGATCCCTTATAGAACAACGAATCTGAGCTACCATTTATCCAGATTTGTTAGTTTTTTTTGGACGGAGGGAGTATGTAATTcctccatttcatattactaaatcattttgactttggtcaaaatcaaactactctaaatttaattaagtttataaataaatatag
chr10	2502522	G	2502422	2502622	CTAACCCATAACATCTTATTGTCCATTTTACTTGTACTGTTTTCATAAATCAAAACTGTGCATGCTAGAGGGTACCAGAATGGCCATGCACATCCATTTCGGATGTAGAGGCTGGTTTAATCCATTTTCTGAAAGAAAAAAAAAGGCAACACCAGAAGTCATCAGCTTGTCTATCAACTGCAGGTGGGATCCACTCATTAG
chr10	3361289	g	3361189	3361389	atccatcattacctaatttcataactcgcctagaaaccgcgagacgaatcgtttgagcttaattaattcgtcattatgtctcacgatttacatacaaactgtgcaaattagttttttttatctatatttaatgctccatatatgtatccctgcaaaaaaaatgctccatatatgtatccaaagattcgatgtgatgttttt
chr10	4413265	C	4413165	4413365	TATGTATTGTGAGGTTTTGGAGTGATGTTTTATTTTTTTCGGAGTTCCTTTAACATTCCATATTAAATAGGACATCAATGCAAGAAATATTCCTCAAATACGAAACATCATGCACAACATATAGAATATTGTACAAAGACATCATGTTCAGTGCTACTCATTGTTGTGGTCAGTCGGAGTCCTAAAACTACCAGCTTGCAT
chr10	5015206	T	5015106	5015306	AATTTCATCTGATCATTTTTTTTCTAAATCCATCTCCATCTATAAAAACTCAAATTGAAGCAAACCATAGTGAATATAGTGTTTCATTTACATATATATATACACACACACACATATGCCCTTGACATGATATTCCAATTTGTTGTTACATATGCAGTAATTTAGAACACATGGATCTTTCTTTACAGCACATACTAGAGT
chr10	5956428	A	5956328	5956528	AAATGTTGTGCTCATTAAATCTTTATATGTGTTGAGTGTTGTGTACATGCAGGGAATATATGCAAAGTGACTGAATGTGTAGCGGGATCTTTGTACGAATAAATACTCAAAACTTGTACTGATTCAAACTGATTCGATGAACCAAGTATTTATTTACTATCATCAAACTTATCCGGGGTATTCGATCATTGAACTAAGGTA
chr10	7033915	T	7033815	7034015	AACTATGAATCTATGATAGTTCTTGCTGCTGGTCCCTGTACAATTGGGAGCCAATACTGTTTGCCTCACTAGTTTCTTCTTCCTGTTACGTGTTTTCTTATATGTCGAAGGCCAAAAAGCTCTCACCAAATCTTGTATTACTATTCTATTGTCTCCCACTAACTTGCATTTAATATTTTCTAACCCTCTTCATAATCCACA
chr10	8718039	A	8717939	8718139	GACTCAAGAAGATAAGCAGGTATTGGCGGCATAAATTTGACATTTAATAGCCACCAACAACTATTTAATGACCTAGTTTAAAAATGATTCTTTTTATATTATACTAACCTACATACATGCATATATTAGTGCTGTCGGCAAATAACCATATAATCCAAAATATAATTATACGAGAAACGACTGGGTGAACATATCAAATTT
chr10	9194220	T	9194120	9194320	AGCTCTATGGGCTTGATAATTTAGTCTGGTCTTGCAGTAGGTTGCTAAATGCAAGAAATGTATTGCTTGGTCTCCCCACTGATTGCTTATTCGCGCCATCTTATGTGTAACATTTTGAACAGTGGGGAGATATGTGTAATCTATGCTTAGGGATCTTATGTTTCTTTTCTCTATGTTTAGTTATTTGGGATCGTCGTGACC
chr10	10753303	G	10753203	10753403	ATAAAATTTCAAAGCAGCTATAATATTGAACATAAAGGTTTAGCACCATATTGCTCCTTTATATCATTATTGTGGACTACTTTTATAATTTTATATAAAAGGTATGATTTTATTGATTAATGAAATTCTCCATTATCTAGAAAAGTTATATAAAAGGTGAAGTCTTTTTCCATAAATAGGAGGCACGAGGAAAATCATATG
chr10	11360507	G	11360407	11360607	agagcagtcatgctgtgaagtgcttcccaaaatcttaatcgcccCAGACCTAATGACCATTTTTTTTAATGTAGTGTAAGGCTGGAGTCGCTGTAGCTAGGTTTTACtactccgtccgtttcgtttataatgtatcggacttttactaagttaaatttttgtgagttatttggccaatttatagaaaatagtagtaaatta
chr10	12046225	A	12046125	12046325	GACGGCGCGGCGTGGCGCTCGCTCTAATCGCGTGATCAAATGAGATTGCATTGACGCGTCGTGTTACGAGGCTAGGGCGAGGAGGAGAGAGTCGCGCGACACTTCTGTTCTGATCAATACACGCGCGTGTGGGCGGCGGGCGCCATGAATCAGGAAGAAATAAGGATCGCTATTTTCCTTTTTTAAAAAAATAGTCACTAT
chr10	14062414	C	14062314	14062514	TTAACCGTTTTGTATAAAACACAGACAAAAGTATAATCCATTCGTCCTAGAATATAGCAATCTAGAATCGGATGTGATGTATCCGAATAAGAAATCTAGACAGGTTCGGATACATCGCATTTGATTTTAGGTTGCTATATTTTGGGATGGATGAAGTGGGTACTCTTCAACAGAATAACGAGGATTTTAGAAGCAGGAGAA
chr10	14530202	G	14530102	14530302	ATCTTGCGATTCCAGTAGCGGACGGTGGTCGCACCGGCGCTCAAGGGGTCTACAGATGACGCATGGAGAGGAAAGGGAAGAGAAAGGGCAGTGATGAGGAGGAGAATGAGAGAGAAGAGAAAGGATGTTGCCATTGGTTGGTAGAATGCTAGCTGTGCTGGAAAGACAAGTGAAGGGAGAGAATGAGAGCGATGAATAAAT
chr10	16698324	A	16698224	16698424	ATTCGTATCGTCTGCCATTAGGCGGAAATGGCAGACGCGCACAGTGTTTTGGGTCTGATGCTACAGTAACAAGCAGGATTATACCAGTATTGCACTGTAGATACAGTACAAACAGTACTGTAGCGATACACTGTTTGTATAGTACTGTAGCGAATAATCCCGTCCATTCGCTGTAGATCGGACGGCTGAGATCGTCCGAAT
chr10	17147034	T	17146934	17147134	ATATTTTGCAGTAGAGGTCTGGGAATTTCTTTCCCTCCTACATGCTTGAAGTGCATCTAATTTTCATTATGTTAGTTCTCATTGTAGTATTCACTCAAGGTGCCTTTGTAAAAGAATTTCATTCTGATCTATTTTGCAAGAACCTGGACGAGTGTAATATTTTCACTTATATATCTGCAACTAGTTTTTGCCCATTTTGAA
chr10	17478428	A	17478328	17478528	ATCTTTTTGTCTACAATGTCAAGAACATCTCATCCTCTGCTTGTTATTTTTGTCCTGGTTAACTAACAGTTCATTCATTTTTTGATATGGCAGTTCATTGACCAAGACGAACTGCATGAACTTTGCTGCACATCAATACACAGTGATATTCTCACTGATCACTGGATTGGTGGAGCATTAGTATGCACTAGGATGCCATTT
chr10	18168621	T	18168521	18168721	GCCTTAAGATTATTTTCCCCATTTAATTTCCGTGGTCCTTCACTACCATGCATGTAGGGACAAGCATGTAGCAATGGACAATGGCCAAAGGGCACAGTGGTCGTCAACAATGTGTAGTCATTCAACGACGTGATGAACTCGTTTAATCGCCGCAAAGCTATCTTTAGATATGTACTACTCCAGTACCCTTCTCAACTCCTA
chr10	19670504	g	19670404	19670604	tttttttacttaaacttattgacttagattttaactcagcttattagcttatgagtatgatttataaaccggtgaatttaatattctaattttaatggtggagtcatacatctacgtcgcataaactaaaaaacttctctaacctagcttttagtttaatagtgttagagtggtattagcataaataaaaccaaatgaaaa
chr10	20671754	g	20671654	20671854	TCGATAGAAAGATAAAGGATGTAAGTTGTACTTACTGCAAATAGGAATGCTTGATGCAAACTAATGGGTGCCCACCCTATCCCTCATTTTCTCTggatctgtttggtagaactctctaagcgttggttatggagtggaattgtctaaacccagctctacctctattgttcattttgtgagagcactctaaactgtttaact
chr10	21312781	c	21312681	21312881	AAACAAATGATATAATGATCTTTTTAACTTTTTCACTTTAATGCCATTCTCAACCTTCTAAATTTAATTTGGCAATGCTAAAATTTAGTAACATAACTggctgtgtttagttccacaccaaaattgaaagtttgaagaaattggaatgatgtgacggaaaagttggaagtttgtgtgtatagaaaagttcgatatgatgga
chr10	22000161	T	22000061	22000261	CTTATCCACCTGTATTTTTAAGTTCATAGTAAAATGTCCATGTGTTGCAAGTGCAAAGAGCGAATGTAATTCTAATTACGGGAATGTAAGGGGATGGCATTCGTTCCGAGCGGTGGAACTGGAACCTACGGGATGTGACTAGCTCTCCACCATGTATGAGCGACAAGGGCGAGCCACCCCCTGGCGTGCctcgtccgacca
chr10	22775728	C	22775628	22775828	CCATTATCATTTGTGGGGACTGGAAACACGAGCTACCAAATAATTGTGGATTGATCAACAAGCATTTGCATCTTGAAGGAAATTATTGGCGCACCCAAAGCACAATTCATAGCATACGATGCTGCTTGCTGTTTAATTAAAGCATACAAACTGAACCGAATAGTGATTACTCCAAGAATAAATTGGCATTACAAATTCAAA
chr11	502632	c	502532	502732	ggagaagtcccgacacaaaaaagagagatggtgcatgtggtatccccttgagatataaaaggaggaccttgcccacctagagaagaggaggattcggatccagaacgaggaggggctggcttgcactttgtagcttcttcatacacagatccatcaaaacacaggagtagggtattacgcttctcagcggcccgaacctgt
chr11	2134087	G	2133987	2134187	TTGAAGGCAATAAATAGGATTTGAATTCTAAAATTGGTATTATGTATATTTTTGGCTAAAAGGGGAAATTGAGTGAAGAATATAAGTTGGAATTTCCTTAGCACAAGAGCAATTATTTTAGGAATATATTATTCTTTGTGCCAAGGATATGGTCAAGGAATTTAGATGGGATTCAAAGGTAATGGAACCTAAGGGAGTATG
chr11	3535035	T	3534935	3535135	TTACTTTAAAAAAACATCATTACCCGTTGCAATGCAGACATTTTTTTTAGTTTTATAAAAAGAAAAAAAAGGACATGCCTGACCTAGCAAAATAGATTTGTAGCTTGTTGTTGTTGCTGTAGTTAAGTACTAACACTTCTCTCATGCATAGATACATGATGCAACGGACCTCGGGTGCGGTAGACCCCGCGGTCTCAGGCG
chr11	4174740	G	4174640	4174840	GCCGTGCGGAGGCGAGGGAACGGCGACCAGGACGGGGCCGGAACGGCGGCGGCGGTGGATCCTATCGCTCCACAGTTTTGACTCGCACAATTGCTAATGCGAAAGGACGACCTTACCCTTCCACCTCTCTACCATTATGCGGTACCATCCAAGTACCTGGCGGTACCGGCAGATAACAGCCATTGGATCTGATCCAATCGA
chr11	5855340	A	5855240	5855440	TTGCACGCGAAAATCAACCAAAAAACTAGATTAAAAAAACAAAACCCTATAATTCCAATCTTTTTTTCATCCCTTCTCCCACCGCACGCGTAGCACATCCATCCTCTCCTTCTCGTATTGTGTGCACAACCAATGCATGAATAGACCACGTGCCATGTCTTTTGATTTTATATTTTCATTTGGTATCAATAATTTGGTTTT
chr11	6017159	C	6017059	6017259	GATTGTTGAAGGCCGGCTGTTGATAAATGTTGATGCAGTCGATAACATCACCGTCGTCAGCCTAACACAGTAGAAGCCTTAATTTGCTTTATCTTGTATACATACTTGTTTAGGAAAATTTGGATGCTAATTGCAAAACTAACAAGTAATAAATTATTTTTTTTTGAGAATAACAAGTAATAAATTATAAAGGAAATTAAA
chr11	6648965	G	6648865	6649065	ATGCTCAGATATGGTTTCTTGTTTACTAATGTGTAGATATGTCTTGATATCTCAAGAGAGTATTGCCGGTGATGGATTGGGAATTAAGTTGGGAGAAGATGACGTCCGAACAATGAGGATATCATGccattgctgcacaagtgatctttgccgccggttgggaagctcttattgtcccggttatgcaaccgggatggcaaa
chr11	7002377	C	7002277	7002477	TATGCTATAACTATATGAAAAGAATCAAATTTGGAAATTTCTATAATGAATATCACTCAAGGTTATACAATATTTTAGGAGAAGGAAATGGCGAAATTTCCGAGCGAACATTATGTCCTCAACTCAAACTCTCTCTCGCAAACCAATGTGTTGTACTTTATTACAATTTTAAAGAGTTGCGTTGACAACAAAGATATTTTT
chr11	7947227	C	7947127	7947327	AATTGTATTGGAATTTAATAAATTAGAGGTATTTTAATCTTTTAAGTTTCGTATTGGTACGTGTGGGATGGGTTAAAGATAAACTTATTTTAGGACAGAGCCGTGTTATCTTGTTGGTCCCTTCTAGATTCTACTAACCATCATATACAACCTATTATTACAATAACCTTGTCAGCTAGGGTTGAGTTTGAATCAACTTTT
chr11	9097827	G	9097727	9097927	ccactctctttttgaatggagctgaaaccatttgagtatgattcgacttcagaaaatatggagcagaagctAATAGGCACTCTACCACCAATGCTTCCTTGCTCTGTTGACAATTCTCTAAGCATCTACTGAATGATAATACTGCTGGCATACCCTGCTCTCCAAAGTCCTAAAATACTTCACCGAGCTCCGAGCAAATCT
chr11	10280620	C	10280520	10280720	TTCAATAATTGCACAAATTTGTAGAGAACAAATGTAGTGTGGATTGTCATCACATAAGTATGTGCATGGCTGCCTTCTTCAGTCCTTGCTTGCAACAAGTCGGTGCCAGAATTCTCCGAGAGCCCAAATGGGATATAAGTTGCGGTAGTTCGGGTAATTGAAGTAAAGTGAAGAATTGAAGCATCCAACATGTTCCTTCAA
chr11	12089983	G	12089883	12090083	TTGAGTTAGTTCTCTTGTTATTGCCATCAATGTTATTTGATCGCTGATTGATCCTGATCACCAAGGGACCGACCAGGAAAATTAATCGTCGATCAGCCTCGATTAGTCGACCTGATCAGTACTATGAATACTAGAACCTATATTCTATATAGTGCATAGTATAAAGCAATCACAGCACTAATAATTGATGGCAAGATGGTC
chr11	14510141	g	14510041	14510241	ccgactaccaccagatcagcatggcataagtggacgaggagaagacaacatttatcacgccgttcggtgtattctgctacgttaagatgctgtttggactgataactgagggaaacactttccagcgtatagttcaaggggcacttaatgaccagctcggacacaatgtcgaggcctacgtcgacgacattgttgtcaaaa
chr11	15355335	C	15355235	15355435	CACCATGTCCTCAATGATCTGCATGATGTGGCGGTGCACCTCATGTTCAGATCGGGCAACTTGATGCTCGAAGTAGCCAGACTAACTGCTTGTTCTGTCGCTGTGTCATATGATACCACGAGGGAAGCGGCCGGTGCAATCGAGGAGAGATAAGATACTCGCGACTCGCGCACGTACTTAGTGTGAGAGGAAGTTGCGAGA
chr11	16501778	g	16501678	16501878	cgagccgccaccgcctgtgtcgtctccggctgcctcttgccggcgttcccagccacctcatgccgcaccaccgcctccaccacattcgccacaccttgccgcacgccagccgccactccacctctccaaaacaaccgccTAGTGCCACTTCCACCACACGCCCGAGCCACCACCACCATACGCCGTCTCCAGCAGACCACC
chr11	17093482	g	17093382	17093582	acaagcttgccgaattttatgtgaaccggatagtatgtttgcatggagtaccacggaagatagtctcagatcgaggaactcagtttacctcacgtttctagcaggctcttcatgaggcaatgggaactcatcttaatttcagtacagcatatcatccacagacggatggtcagaccaaaaaagttgatcaaattttggagg
chr11	18509780	c	18509680	18509880	gatttgtgaccggcctgacactggtcatgtcgtcggcagacagctatgttcccacgtcgcgcctgcttccggcggaagtggaggtaggtatgggccgtcccatcagaaggccattcggactacaaccattacaaatctccgcccatttatgaaggaaaggcgggccaagttttaagaaaaagaggatgggtccccaccaaa
chr11	19206909	A	19206809	19207009	AGTATTAGAAAATTTGACTGCCTGTTTGTATCATTTATTTTCTAATAGTTCATCCAATTGCCATCTCATATATTCTGTACTCAAATTCAGTACCGTAGAGAAGATTTTCAGTATGGTTGCAACATTGTACCGTGCTCTGTTATTTGCTTCTTCGAATGAACTCCTTTTCAATGTTTCAATTTTTGTGCCCAAATTCAAGAA
chr11	20110135	C	20110035	20110235	AATATACTACTTTGGTTGAAGCAAAAGATTCCTTACATTGGTATAGAAAACATTTGTGGAGGCGTCTGATAAACCTTTTATATAGGTGTTTCCCCAACCGCCTGCAATCAATGGCATGTGAAAATCAGCTATTTACAAGGGTGGAAAGTCAGCCGCATGTGGAGAAACCTTGATACAAGTGGTTTACTTAAGATAACCATG
chr11	21181100	A	21181000	21181200	TCTCTCTGCTATATATAGAGATCTTCAGTTAATCAACTATAGCTCATGAAGCTTGTAGATTGGTTCTACCAATTAAGCTAAGTTTAACCTGAATTTGTATACATATAGGTCATTGTTCAGATAAGGAAATTGTTCTTCTCGAGCAAGGAAAAGATGGCGCCGTCGTCGCCACCGGCGATGAACATGGCTTGTGCGAGACAG
chr11	22269490	A	22269390	22269590	GCTGCAATAAGTTAACCTCTTGTTAATAAGTGCTACATTATGCAAATAGAAATGAGATCAGCGATTTACTAAATCAATCATGGTTTTTTAGTTTGGTAATACATGGATTGCTGGTTGATCAAGATTGAAGTTATTGCTCAAGGAACTACTGTAGAATTTGCTGTACGTCTTTTTTTTTTCTCTAATGAAAAATCACCTGCA
chr11	23029660	A	23029560	23029760	GGTTTTAGTCTTGTTGGCATCCTTCTGTTAAGGAAAATGGCAAGCAAAGCAGGTGGTGACGGCAAAGAAGCCATCAATGAGCAAATAATTGCAAACACTTATGGGAACATGCGGTCTGAAATGACTCAACTTTACACCAAGATTACAGAATTAGAGATGGAAGTCAGTGAACACTCTCTTGTGATTGGCGCAATCGAGCCA
chr11	24107429	T	24107329	24107529	TAATACGTAGTTTAGGATAACAAGCAACAAAGGGGTCTTTTTCAGAAAACCAGGGTACAAGCTCTAGTTGGTAGCCTCACAACCAAATTACTTACCACCTTGCTATAAGCACATTATCGATGATTTCAACTCTTAGCCTATAATAAATAAAGGAAGCGAACCTAGCTGTTTAATATATCAACATAGGACACCAATTAAGGT
chr11	25104609	C	25104509	25104709	TTAGCTGTTGTGAATTGTGATTTACATTTCGCACTGAAGTAAAATAGGCTAGTATCTTGCCTACTGGCTGGAGAAGGCAGGTTGGCTAATAGCTAGCATGCATCTCTGTTCTTACCCATCACGTTGGAGTTTGATCGGAAgtgccttatattttaggacggatggagtaAGGGCAtgtttagttctcaaacaaattttttc
chr11	26020831	T	26020731	26020931	ACCAAACAGGCCCGTTGTCTAGATGGGCCTCAACATCGATCCATCCATGTAGCTATGGCCTAGACTACATCTAAAATTCCGGTCCATGCATGTATATAGATCAGGATTGAGGCCACCTAAACCAGGGCGGAATTGTACATAGGTTGACCGATATGTGCTGACCGCTTGATGGACAAACtgaggccgtgtttagttccaaaa
chr11	28042026	A	28041926	28042126	TCAAAATTCAATGGCCTAGGCTCGAGAGGTTGGTCTGGCGTTTCACTGTAATGGATTCTCCTCAAGGAGCTCCAGCTTGACGACCAATGTGACATGGAGAAGATTGCGCAATCGCATAAAAACAAGGTGAAAACGGTATGGAAATCTTTCCGATAGTATTGATACCATTTCCATATAACTAATACTTCCTCCATCCCATAA
chr11	29208076	G	29207976	29208176	AAGCCAAGACAAAGATTCGTACTAAATCTGTTAGGTCCATTGGCATTAGAGTTTCTACTTTCATTTAAAATAGGACTACGTGAGCTGTAAATAAATAAATGCATTTGGGATTTGTGTACTCTCTTATAGGAGCACTACGGGTGTTCCAACAATATATAATTTCTGAAAGATAAAAGCATACAGTGATTAACAAATGACAGA
chr11	30596985	T	30596885	30597085	CTCCTTTGAGTTGTTTCAAAAAAAAAAACTTTTCTTATTTGAATCCCAAACGTATTCGGTTGGAAGCTAATTTTGATTTGTTTAAACCGAAAACAATTAGTAGCTAGTACTACTCTAACccctttctgtttatgctagacttgtggccttagatttttaagtcaattttttcctggtttattagttgatTTTCTATACTTG
chr12	409588	a	409488	409688	tccaggatttatcggcgtcgtgctttcagtggtaggcgacgtatccatcgacagcgaggcgtctgtggtaggcaacgtacccgtcgacagcgaggcgcctatACTGTGATGCTcataggcgctagctttcagtggtatcttttagtggtaggcgacgtacccgtcgacagcgaggcgcctgtACTGGGTAGAGGTTTGTGC
chr12	1547581	a	1547481	1547681	TATATATTTATATAAGACAGATGTAGTAATCATATATATACTCACTCCttccaaaaatctgagtcctatttacagtcactatatgctaaattaaattgttaatcagaaaacaagaagccattctagtacttattggttgaatgttcattggttttgccacatggtgagtgagttaattgctttttggttttgatgaaaaaa
chr12	2091263	c	2091163	2091363	aattgagtggatattatattttaatgtgtctagtgtccagcagcaaattaccggaattttgaagtgttctcgggcaaattcacatttttatgatgtcccacagctaattacgcatttttaagtgtcctatagcaaattttgccttgtttctaacctttagatgattaatctatagcctaaataattttcttcattttcttc
chr12	2582233	a	2582133	2582333	ataaatagaatcccaataatgattaagaggaggggcgatagacaagccgttaagcagcacaatcacgacggttggagggacttctagaaactaaaaggtaaatcgcaatgacaatcatgttcgatttttaaaatctcaatgataacaaaaatacatgagcatagtggcgaagtcggcggcacggtggttgggcggatttct
chr12	3149204	G	3149104	3149304	tccctccgtcttaaaaaaatctaacctaggaggggatttgatcccttctagtacaacgaatctagatagaagtttgtccagattcattgtaCTATGGGGGGTCACATCCCCTCGTAGGTTGGGTTTTTTTGGGAGCAGTATAGCTAGCGACTCTATGATAAGCACTAGAAAACTGTAAAATGAACTTGCCAAATTTACATA
chr12	4580112	A	4580012	4580212	TAAAATTTAAGAATTTGTTATGGTTAATAAGTCAATAAACGAATTTCGAATGGAGCTGGGCTACGTCGTGAAGAAAACTTCTGGGGCATTTGTGCCACTCAGTTTTTCAATTACGAATGAATGCCACTCGAAGAACAGTGTTCTAATGGCATTTTTTAATTTTCTAGCAAAAGTCATGTAATTAATAACGGTTCAAACCAA
chr12	5576026	C	5575926	5576126	TGCACAGCCACGGCGTTGCCATGCGTCCACCAAACACCTCCTAACCTTTGTAGTTCTCATAGCCAAACCACCATTCCTTCATTGCCCATCGATGCCCTCTCACATGGCACCTTTTACGTAGTTACTGGCATCTCACATTCCACCACCTCCACCTTTCTCTTGACTAGCTTGTTGTCTTCTCCAATTCCCTTCAACCCTAGA
chr12	6585640	G	6585540	6585740	TTCATTTCAGTTTAAAAAATAAGGAGCTAATGTTTGTTCAAAAAACTATGCTGATAACAGATAGTGGCATGAATGTTAAGTGATCTATTCCCTGTGAGCCGCATGTTTAGTTGTTTATTGTAAGAAAAATTGGTTTCGTGATATCCAAGGATGCTAACTTCAGAAATATACCATCCAACTTCTCAAGTACCCTTTAGTACC
chr12	6614218	t	6614118	6614318	AGGCCGCTAATATGCAGGACCTACGTGGGTCCCACGCGCCACGTCTGCTTAGACCAGAGAGTATACTGCCTAGGATCTGCGGTGTAGCAgttttataagttaagggactcgttatatctagtatttcggttcagggatgaatttcagtctcggtgacaaatagagggatctAAAGAAAACTTGTCCTAGATCCAACGGCTA
chr12	8162389	G	8162289	8162489	GTAGGCAACTTGCTATCCTTCAAACGGCTGGATTTGATGGAGTGGGAGAAATTCTATAATCAACTGAACTGGGAGTTGCACAATCGCTTGGATAACCAAGGACTCAGCATGGTGACTCGACTCCTTGGTTTAAGCTACAAGCATCTACCGGTCCACTTGAAGAACTGTTTCCTTTTATGCAGTATCTTCCCAGAGGACTAT
chr12	10613978	T	10613878	10614078	CATTCACAAATAAAATAAATCATCAAAATTCCTCTTGTTCCCATGGCATTCATCCCAACAAAACCACATGAATGTCAATCACCAGAATCACCACATGAATTGGAATCATCGATCATAGTAGCAAGAATGTGAACAACATGAACAACACAAGACAAAGTATTTGGGTGAAAGAGGACTGGCAGGCAATGGATCTGAACGCCT
chr12	12333911	c	12333811	12334011	tctgagagttttttatcaagtactcataggctggaaacggagctcgtatgcattatcacacaactcttttttttcgcaaggaacaacaaataaatgaactcgtgacaaaggaatttcagcaattagttccactaatgtttgctctactatagcatgaaaagtgaacatgtataactcagcttgagaatacttacattcatt
chr12	15529779	C	15529679	15529879	TTACAATGCAATATAGCATTTGGTATTGTTGGTTTACATTTTTTTCACACAATAGCGTACGTTATAATTAATTAATAGCATCACAACCTATTTGCAAACTCTTAAATGGATATTCACGATATACAAACCTAGTCATCACTATTGTAACTCATTTTCTATACCCTATTATAGAACCAAAGTGGTCACGGTCATAGTGAATCA
chr12	16842118	T	16842018	16842218	GTTTGTAGGAGTGTTGAAACACTATTACTCGATCATAATCACGATCTAGTTGTACTCAACTATTGTTTGTCGTGACTTGATGGCATCCTCTACTTACTTATCATTTCTTGATGGTTACCCACTTACTATGTTCCTTTATTTTCTTCCTTTATTTTCTGTACTTGATCACACGCATGTTTATTGTTAGGTGCACTATGCACG
chr12	17148870	G	17148770	17148970	GGGTAGTGGCCTAACCCAGTTCTCGACTGAGTTTGGTCCAGATAAAACAGAAAATCTATAGAACTACATACCGTTTGAACGGAGTAGAGTAATGATCAACGCCCTACACCTTATCTTCTTGACTCGTCTATGCAGCGTCGTCCACCACCCACCACGCACAAGTTACTCCCTCCATCCTCTGTCCCCCTCTCTACGCCCACG
chr12	17687076	C	17686976	17687176	AGGCCAACGAGCTTATAGCTATGTTGGGTCATCACCATCTTCACCTTGCACTTCTAGGGCTGAAAACAGGACGGATTCAGATGAATACAGTTTATATCACCTCATATCCCATATTTTCTAAGCGGATTTAGAGTGGGTGCACCAGGTGTGTGGATACGGGTGTAGAGCAGATTGTTTCGGATGTCATGACTGGTATGGAGT
chr12	18072385	C	18072285	18072485	GTGGATGCAAAATATCTACGTCGGCAAACTTACACTAAACTTAACAGCATTTGGATCACCTTCTAGGGCAAGCTGTTCAAGAGCAGGACCGCCACCTTTCCGCATATCAAGACCTAACCATCTCGCTGACTTGTCATAAGCCTCACCAATTGCATCATCTATTGTAGTTCCCAGTTGAACATATTGACCAAGTCCATGAGC
chr12	22301040	G	22300940	22301140	ACCTCGCACAAATTAAAGGATATCTGTTTCCCTTGCTGTTTGCACACAAGATTACGTTAATAGTAAATTTCAACCATAATAGGTTAATCCGCACCGCACCGCAGTTCGATCTCCCTCACTTTTGTTTTCCTCTTATTTTCTCCATCGCGCGCCTGATTCGTTTCATTGTGGGTCTGATCGGCCATCGCATAAATGCTCGTA
chr12	23055586	G	23055486	23055686	ATGAATTGTGGACCGCATAACCACTTTAAGACAAGTATTTCCAGAGGCATAGAACTGGAAATATTATGACCTTTGCTAGCAGTAGCAACTGAATTTGTTGGCCTTGAAAACGCTACGGCCATATTACCTATGGAACAAATATGCCCCTTATAGAAGCATTTATTGTACCATTAACCCCTTTGAAACTCTCTAAAAGTGTGA
chr12	25523151	a	25523051	25523251	attattagcccgaagagagtatatagttaatttaatagctaattcatacaatagttacctataaatatatactacactagtgatacttggtcccacatgtaatacacacattgcgtcttgtaatctgtactacagctggctacaaatctgtagcccgctgctcttctctctcctcatttatcatctcaacatgtgtttata
chr12	26000189	T	26000089	26000289	TAAAACAGGTTGGTAACTGGTGCCCTATCATGCCATCTCCAATTTCCAGGAAGAGAGGAAAAAGAGGACTTTGCCAATCATTGATGTGATTTCATCACCATCCATGAATGTCTGCCACATCTGTGGGTACTACTACTATGTATAGGATACCAAATATGCTCTGCCTTCAAATGCCATGGGGCACTCCTGTCTGCAGATGAG
chr12	26506033	G	26505933	26506133	ATGGATTAATTAAGTAATCGAAGTTGCAACTAACAAGGTGATCGATTATATGTGTCATCACCTTGATCAGCATTACTATATGTACCAGCTTTTCTGGAGAGTGCTAAGCTAGGCAAGGTAGATTGGTGACGCGTCGAATCTTGCCACCCTTGGAGGATTGATCTCTCTTTAGAAAACCAAAATAGACATGTACTAGCTACT
chr12	27504459	G	27504359	27504559	TCTTTTTTTTTCTACTGTGACCACAATATCACTGTACCCACCACTTATATTATACTATGATCTTAGAACACGTGATCCGTAATTTAGACATAACCCACATGCATCATCCAGTGAATTAGGAAAGGGATAACAACACTAATTAATTAAGTATGCTTGCTAACGATGGTTAGTAACCTCTCTTCAAATCAAAGGCATGAAATA
chr12	27728813	T	27728713	27728913	GGTGCACATGACCCCGGATAGATTGTTCATCTCTAGCTGTTTTATGCCATCTTAATAAATTAGTCAATGGTTAGATCATTAGTATGTATAGAACACCCGGTAATTTTTGTTCTAGGTTCGCCACTGGCTACAATTGCTAATCAAAAGAGTTGAACAGAATGCTTGTTTGGAGAGGATGTTCACAGGTAGAACCTTTGATTC
